1 **Monitoring SARS-CoV-2 infection using a double reporter-expressing virus**

2 Kevin Chiem<sup>1</sup>, Jun-Gyu Park<sup>1</sup>, Desarey Morales Vasquez<sup>1</sup>, Richard K. Plemper<sup>2</sup>, Jordi B.

3 Torrelles<sup>1</sup>, James J. Kobie<sup>3</sup>, Mark R. Walter<sup>4</sup>, Chengjin Ye<sup>1\*</sup>, Luis Martinez-Sobrido<sup>1\*</sup>

4

5 <sup>1</sup> Texas Biomedical Research Institute, San Antonio, Texas 78227, USA

6 <sup>2</sup> Center for Translational Antiviral Research, Institute for Biomedical Sciences, Georgia

7 State University, Atlanta, GA, USA

8 <sup>3</sup> Department of Medicine, Division of Infectious Diseases, University of Alabama at

9 Birmingham, Birmingham, Alabama 35294, USA

10 <sup>4</sup> Department of Microbiology, University of Alabama at Birmingham, Birmingham,

11 Alabama 35294, USA

12

13 \*Lead contact email and correspondence:

14 [cye@txbiomed.org](mailto:cye@txbiomed.org)

15 [lmartinez@txbiomed.org](mailto:lmartinez@txbiomed.org)

16

17 **Running title:** A double reporter-expressing recombinant SARS-CoV-2

18

19

20

21

22

23

24

25 **ABSTRACT**

26 Severe acute respiratory syndrome coronavirus 2 (SARS-CoV-2) is the highly  
27 contagious agent responsible for the coronavirus disease 2019 (COVID-19) pandemic.  
28 An essential requirement for understanding SARS-CoV-2 fundamental biology and the  
29 impact of anti-viral therapeutics are robust methods to detect for the presence of the virus  
30 in infected cells or animal models. Despite the development and successful generation of  
31 recombinant (r)SARS-CoV-2 expressing fluorescent or luciferase reporter genes,  
32 knowledge acquired from their use in *in vitro* assays and/or in live animals are limited to  
33 the properties of the fluorescent or luciferase reporter genes. Herein, for the first time, we  
34 engineered a replication-competent rSARS-CoV-2 that expresses both fluorescent  
35 (mCherry) and luciferase (Nluc) reporter genes (rSARS-CoV-2/mCherry-Nluc) to  
36 overcome limitations associated with the use of a single reporter gene. In cultured cells,  
37 rSARS-CoV-2/mCherry-Nluc displayed similar viral fitness as rSARS-CoV-2 expressing  
38 single reporter fluorescent and luciferase genes (rSARS-CoV-2/mCherry and rSARS-  
39 CoV-2/Nluc, respectively), or wild-type (WT) rSARS-CoV-2, while maintaining  
40 comparable expression levels of both reporter genes. *In vivo*, rSARS-CoV-2/mCherry-  
41 Nluc has similar pathogenicity in K18 human angiotensin converting enzyme 2 (hACE2)  
42 transgenic mice than rSARS-CoV-2 expressing individual reporter genes, or WT rSARS-  
43 CoV-2. Importantly, rSARS-CoV-2/mCherry-Nluc facilitates the assessment of viral  
44 infection and transmission in golden Syrian hamsters using *in vivo* imaging systems  
45 (IVIS). Altogether, this study demonstrates the feasibility of using this novel bireporter-  
46 expressing rSARS-CoV-2 for the study SARS-CoV-2 *in vitro* and *in vivo*.

47

48 **IMPORTANCE**

49 Despite the availability of vaccines and antivirals, the coronavirus disease 2019  
50 (COVID-19) pandemic caused by Severe Acute Respiratory Syndrome Coronavirus 2  
51 (SARS-CoV-2) continues to ravage health care institutions worldwide. Previously, we  
52 have generated replication-competent recombinant (r)SARS-CoV-2 expressing  
53 fluorescent or luciferase reporter proteins to track viral infection *in vitro* and/or *in vivo*.  
54 However, these rSARS-CoV-2 are restricted to express only a single fluorescent or a  
55 luciferase reporter gene, limiting or preventing their use to specific *in vitro* assays and/or  
56 *in vivo* studies. To overcome this limitation, we have engineered a rSARS-CoV-2  
57 expressing both fluorescent (mCherry) and luciferase (Nluc) genes and demonstrated its  
58 feasibility to study the biology of SARS-CoV-2 *in vitro* and/or *in vivo*, including the  
59 identification and characterization of neutralizing antibodies and/or antivirals. Using  
60 rodent models, we visualize SARS-CoV-2 infection and transmission through *in vivo*  
61 imaging systems (IVIS).

62

63

64

65

66

67

68

69

70

## 71 INTRODUCTION

72 Severe acute respiratory syndrome coronavirus 2 (SARS-CoV-2) is responsible for  
73 the coronavirus disease 2019 (COVID-19) pandemic (1). Since the first reported case in  
74 Wuhan, China, SARS-CoV-2 has spread worldwide and has been associated with more  
75 than 500 million confirmed cases and over 6 million deaths  
76 (<https://coronavirus.jhu.edu/map.html>) (2), in part due to its innate high transmissibility (3,  
77 4). In the past two decades, two other human coronaviruses have being responsible for  
78 severe disease in humans, including severe acute respiratory syndrome coronavirus  
79 (SARS-CoV) in 2002 and the Middle East respiratory syndrome coronavirus (MERS-CoV)  
80 in 2012 (5, 6). Further, four endemic human coronaviruses are responsible for common  
81 cold-like respiratory disease: OC43, NL63, 229E, and HKU1 (7, 8). A unique feature of  
82 SARS-CoV-2 compared to known betacoronaviruses is the addition of a furin cleavage  
83 site in the viral spike (S) glycoprotein which is a major contributor to the virus's increased  
84 transmissibility and pathogenicity (9, 10). Several prophylactic (vaccines) and therapeutic  
85 (antivirals or monoclonal antibodies) options have been approved by the United States  
86 (US) Food and Drug Administration (FDA) to prevent or treat, respectively, SARS-CoV-2  
87 infection. These include three vaccines [Spikevax (former Moderna), COMIRNATY  
88 (former BioNTech & Pfizer), and Janssen], several therapeutic antiviral drugs (remdesivir,  
89 baricitinib, molnupiravir, and paxlovid) and one monoclonal antibody (MAb,  
90 bamlanivimab) (11-13). Unfortunately, SARS-CoV-2 has rapidly accumulated mutations,  
91 leading to the emergence of variants of concern (VoC) and variants of interest (VoI)  
92 jeopardizing the effectiveness of existing preventive and/or treatment options (14-18).

93 Reverse genetics systems have permitted the generation of recombinant RNA viruses  
94 entirely from cloned cDNA, facilitating studies to better understand multiple aspects of the  
95 biology of viruses, including, among others, mechanisms of viral infection, pathogenesis,  
96 transmission, and disease (19-29). Another application of reverse genetics is the  
97 generation of recombinant viruses containing gene mutations and/or deletions that result  
98 in viral attenuation for their implementation as safe, immunogenic, and protective live-  
99 attenuated vaccines (LAV) (20, 30-35). Moreover, reverse genetics have been used to  
100 generate recombinant viruses expressing reporter proteins, thereby abolishing the need  
101 of secondary approaches for viral detection (36-42). In this regard, genetically modified  
102 recombinant viruses expressing reporter genes have been generated to monitor viral  
103 infection in cultured cells and/or in animal models using reporter expression as a valid  
104 surrogate readout for viral infection (36, 43-47). Notably, these reporter-expressing  
105 viruses have the potential to be used in high-throughput screening (HTS) settings to  
106 identify antivirals or neutralizing antibodies that can inhibit or neutralize, respectively, viral  
107 infection; and to visualize the dynamics of viral infection in validated animal models using  
108 *in vivo* imaging systems (IVIS).

109 Fluorescent and luciferase proteins are used to generate reporter-expressing viruses  
110 and represent ideal choices due to their high sensitivity and stability (48-54). Since these  
111 reporter genes have dissimilar characteristics, their selection is largely motivated by the  
112 type of study or application. Fluorescent proteins are easily detected when excited by  
113 absorbing energy at a particular wavelength, which is subsequently emitted as light at  
114 higher wavelength as the molecules drop to a lesser energy state (53). Hence, reporter  
115 viruses expressing fluorescent proteins are typically used for *in vitro* studies to observe

116 cellular localization and/or to identify the presence of infected cells (25, 36, 37, 45, 55).  
117 Moreover, fluorescence-expressing recombinant viruses are used to identify the  
118 presence of the virus in infected cells in validated animal models using *ex vivo* imaging  
119 (36, 37, 43-45). However, *in vivo*, fluorescent signals are often obscured by  
120 autofluorescence and have insufficient detection due to light scattering. Conversely,  
121 luciferases produce bright and localized signals in live organisms to be monitored in real-  
122 time using IVIS and represent a viable surrogate of viral replication (36, 37, 56). Moreover,  
123 viruses expressing luciferase genes are more sensitive and convenient for quantitative  
124 analyses compared to their fluorescent-expressing counterparts (37, 43, 46). Despite the  
125 clear advantages of both fluorescence and luciferase reporter genes, only recombinant  
126 viruses expressing either fluorescent or luciferase reporter genes have been previously  
127 described in the literature (36, 43, 44, 46, 47). In the past, we overcame this issue by  
128 generating dual reporter viruses expressing both luciferase and fluorescent reporter  
129 genes and demonstrated its advantages with influenza and vaccinia viruses (36, 37, 56).

130 In this study, we used our previously described bacterial artificial chromosome (BAC)-  
131 based reverse genetics (20, 21, 57-59) and the innovative 2A approach (43, 44) to pioneer  
132 a rSARS-CoV-2 expressing both fluorescence mCherry and luciferase Nluc reporter  
133 genes (rSARS-CoV-2/mCherry-Nluc). Our results demonstrate that rSARS-CoV-  
134 2/mCherry-Nluc has similar properties in cultured cells than rSARS-CoV-2 expressing  
135 individual mCherry or Nluc reporter genes, or wild-type (WT) rSARS-CoV-2. Importantly  
136 expression of the double mCherry-Nluc reporter gene did not affect viral replication or  
137 pathogenesis in K18 human angiotensin converting enzyme 2 (hACE2) transgenic mice  
138 or golden Syrian hamsters, validating its use for both *in vitro* and/or *in vivo* studies.

## 139 **MATERIAL AND METHODS**

### 140 **Biosafety and ethics statement**

141 *In vitro* and *in vivo* experiments involving infectious rSARS-CoV-2 were conducted in  
142 a biosafety level 3 (BSL3) laboratory at Texas Biomedical Research Institute.  
143 Experimental procedures involving cell culture and animal studies were approved by the  
144 Texas Biomedical Research Institute Biosafety and Recombinant DNA Committees (BSC  
145 and RDC, respectively) and the Institutional Animal Care and Use Committee (IACUC).

### 146 **Cells and viruses**

147 African green monkey kidney epithelial cells (Vero E6; CRL-1586) were propagated  
148 and maintained in Dulbecco's modified Eagle's medium (DMEM; Corning) supplemented  
149 with 5% fetal bovine serum (FBS; VWR) and 1% PSG (100 U/ml penicillin, 100 µg/ml  
150 streptomycin, and 2 mM L-glutamine; Corning) at 37°C with 5% CO<sub>2</sub>.

151 Recombinant (r)SARS-CoV-2 were generated based on the whole genomic sequence  
152 of the USA-WA1/2020 (WA-1) strain (accession no. MN985325) (43, 58) using a  
153 previously described bacterial artificial chromosome (BAC)-based reverse genetics  
154 system (20, 21, 57-59). Viral titers (plaque forming units per milliliter, PFU/ml) were  
155 determined by plaque assay in Vero E6 cells.

### 156 **Rescue of recombinant double reporter-expressing SARS-CoV-2**

157 A BAC plasmid was used for the rescue of rSARS-CoV-2 expressing mCherry and  
158 Nanoluciferase (Nluc), referred as rSARS-CoV-2/mCherry-Nluc, as previously described  
159 (43). Briefly, a fused version of mCherry and Nluc was inserted in front of the viral N  
160 protein gene along with a porcine teschovirus 1 (PTV-1) 2A autocleavage site, within the  
161 pBeloBAC11 plasmid (NEB) containing the whole genomic sequence of SARS-CoV-2

162 WA-1 strain. We chose mCherry because red fluorescent proteins are more readily  
163 detectable in biological tissues, enabling lower absorbance and scattering of light, as well  
164 as less autofluorescence (45, 60-62). We selected Nluc due to its small size, ATP  
165 independence, and greater sensitivity and brightness compared with other luciferases  
166 (43, 46, 48, 63). Vero E6 cells ( $1.2 \times 10^6$  cells/well, 6-well plate format, triplicates) were  
167 transfected in suspension with 4.0  $\mu\text{g}$ /well of SARS-CoV-2/mCherry-Nluc BAC plasmid  
168 using Lipofectamine 2000 (Thermo Fisher Scientific). Transfection media was changed  
169 to post-infection media (DMEM containing 2% FBS and 1% PSG) after 24 h, and cells  
170 were split and seeded into T75 flasks 2-days post-transfection. After 3 days, viral rescues  
171 were detected by fluorescence microscopy, and cell culture supernatants were collected,  
172 labeled as P0 and stored at  $-80^\circ\text{C}$ . After viral titration, P1 viral stocks were generated by  
173 infecting fresh Vero E6 cells at low multiplicity of infection (MOI) 0.0001 for 3 days and  
174 following stored at  $-80^\circ\text{C}$ .

#### 175 **Reverse transcription (RT)-PCR**

176 Total RNA was extracted from rSARS-CoV-2/mCherry-Nluc-infected (MOI 0.01) Vero  
177 E6 cells ( $1.2 \times 10^6$  cells/well, 6-well format) using TRIzol reagent (Thermo Fisher  
178 Scientific) based on the manufacturer's instructions. The viral genome between 27,895-  
179 29,534 nucleotides based on the SARS-CoV-2 WA-1 strain was RT-PCR amplified using  
180 Super Script II Reverse transcriptase (Thermo Fisher Scientific) and Expanded High  
181 Fidelity PCR system (Sigma Aldrich). Amplified DNA products were separated on a 0.7%  
182 agarose gel, purified using a Wizard Genomic DNA Purification kit (Promega), and sent  
183 for Sanger sequencing (ACGT). Primer sequences are available upon request.

#### 184 **Deep sequencing**



185 RNA sequencing library was prepared with a KAPA RNA HyperPrep kit, involving 100  
186 ng of viral RNA and 7 mM of adaptor, and was subjected to 45 min adaptor ligation  
187 incubation and 6 cycles of PCR. An Illumina Hiseq X was used to sequence all samples  
188 and raw sequencing reads were trimmed and filtered using Trimmomatic V0.32 (64, 65).  
189 Bowtie2 V2.4.1 (66) and MosDepth V0.2.6 (67) were used to map sequence reads and  
190 quantify genome coverage to reference SARS-CoV-2-WA1/2020 viral genome  
191 (MN985325.1), respectively. LoFreq V2.1.3.1 (68) was used to determine low frequency  
192 variants and eliminate sites that were less than 100 read depth or less than 1% allele  
193 frequencies.

#### 194 **Immunofluorescence assays**

195 Vero E6 cells ( $1.2 \times 10^6$  cells/well, 6-well format, triplicates) were mock-infected or  
196 infected (MOI 0.01) with rSARS-CoV-2/WT, rSARS-CoV-2/mCherry, rSARS-CoV-2/Nluc,  
197 or rSARS-CoV-2/mCherry-Nluc. At 24 h post-infection (hpi), cells were fixed in 10%  
198 neutral buffered formalin at 4°C overnight and permeabilized using 0.5% Triton X-100 in  
199 phosphate-buffered saline (PBS) for 10 min at room temperature (RT). Cells were washed  
200 with PBS, blocked with 2.5% bovine albumin serum (BSA) in PBS for 1 h and then  
201 incubated with 1 µg/ml of SARS-CoV anti-N monoclonal antibody (MAb) 1C7C7 in 1%  
202 BSA at 4°C overnight. Cells were washed with PBS and incubated with a fluorescein  
203 isothiocyanate (FITC)-conjugated goat anti-mouse IgG (Dako; 1:200). Cell nuclei were  
204 stained with 4', 6'-diamidino-2-phenylindole (DAPI; Research Organics). Representative  
205 images (20X) were acquired using an EVOS M5000 imaging system (Thermo Fisher  
206 Scientific).

#### 207 **SDS-PAGE and Western blot**

208 Cell lysates were prepared from either mock- or virus-infected (MOI 0.01) Vero E6  
209 cells ( $1.2 \times 10^6$  cells/well, 6-well format) after 24 hpi using passive lysis buffer (Promega)  
210 based on the manufacturer's instructions. After centrifugation ( $12,000 \times g$ ) at  $4^\circ\text{C}$  for 30  
211 min, proteins were separated with 12% SDS-PAGE and transferred to nitrocellulose  
212 membranes. Membranes were blocked for 1 h with 5% dried skim milk in 0.1% Tween 20  
213 PBS (T-PBS) and incubated at  $4^\circ\text{C}$  overnight with the following specific primary MAbs or  
214 polyclonal antibodies (PABs): N (mouse MAb 1C7C7), mCherry (rabbit Pab; Raybiotech),  
215 and Nluc (rabbit Pab, Promega). Then, membranes were incubated at  $37^\circ\text{C}$  for 1 h with  
216 goat anti-mouse IgG StarBright Blue 520 or anti-rabbit IgG Starbright Blue 700 (Bio-Rad)  
217 secondary antibodies. Tubulin was used as a loading control using anti-tubulin hFAB  
218 rhodamine antibody (Bio-Rad). Proteins were detected using a ChemiDoc MP imaging  
219 system (Bio-Rad).

## 220 **Plaque assay**

221 Vero E6 cells ( $2 \times 10^5$  cells/well, 24-well plate format, triplicates) were infected with  
222 25-50 PFUs of rSARS-CoV-2/WT, rSARS-CoV-2/mCherry, rSARS-CoV-2/Nluc, or  
223 rSARS-CoV-2/mCherry-Nluc for 1 h, overlaid with post-infection media containing 0.6%  
224 agar (Oxoid) and incubated at  $37^\circ\text{C}$  in a 5%  $\text{CO}_2$  incubator. At 72 hpi, cells were fixed in  
225 10% neutral buffered formalin at  $4^\circ\text{C}$  overnight and then mCherry-positive plaques were  
226 visualized using a ChemiDoc MP imaging system (Bio-Rad). Afterwards, cells were  
227 permeabilized in T-PBS for 10 min at RT, blocked in 2.5% BSA in PBS for 1 h, and  
228 incubated with specific primary MAb or PAB against the viral N protein (mouse MAb  
229 1C7C7) or Nluc (rabbit PAB). To detect Nluc-positive viral plaques, cells were stained with  
230 a FITC-conjugated goat anti-rabbit IgG (Dako; 1:200) and visualized using a ChemiDoc

231 MP imaging system (Bio-Rad). Next, viral plaques were stained with an anti-mouse  
232 Vectastain ABC kit and DAB HRP Substrate kit (Vector laboratories) following the  
233 manufacturers' recommendations.

### 234 **Viral growth kinetics**

235 Vero E6 cells ( $1.2 \times 10^6$  cells/well, 6-well plate format, triplicates) were infected (MOI  
236 0.01) with rSARS-CoV-2/WT, rSARS-CoV-2/mCherry, rSARS-CoV-2/Nluc, or rSARS-  
237 CoV-2/mCherry-Nluc. After 1 h adsorption, cells were washed with PBS and incubated at  
238 37°C in post-infection media. Viral titers in cell culture supernatants at each of the  
239 indicated time points (12, 24, 48, 72, and 96 hpi) were determined by plaque assay as  
240 described above. At each time point, mCherry expression was visualized with an EVOS  
241 M5000 imaging system. Nluc activity in the cell culture supernatants at the same times  
242 post-infection was quantified using a microplate reader and a Nano-Glo Luciferase Assay  
243 system (Promega) following the manufacturers' recommendations. Mean values and  
244 standard deviation (SD) were calculated with Microsoft Excel software.

### 245 **Reporter-based microneutralization and antiviral assays**

246 Microneutralization and antiviral assays were performed as previously described (45,  
247 69). Human MAb 1212C2 (70) against the Spike protein receptor-binding domain (RBD)  
248 of SARS-CoV-2 was serially diluted (3-fold) in post-infection media (starting concentration  
249 of 500 ng), combined with 100-200 PFUs/well of rSARS-CoV-2/WT, rSARS-CoV-  
250 2/mCherry, rSARS-CoV-2/Nluc, or rSARS-CoV-2/mCherry-Nluc and incubated at RT for  
251 1 h. Then, Vero E6 cells ( $4 \times 10^4$  cells/well, 96-well plate format, quadruplicates) were  
252 infected with the antibody-virus mixture and incubated at 37°C in a 5% CO<sub>2</sub> incubator.  
253 Cells infected with rSARS-CoV-2/WT were overlaid with 1% Avicel as previously

254 described (69). Nluc activity in cell culture supernatants of cells infected with rSARS-CoV-  
255 2/Nluc or rSARS-CoV-2/mCherry-Nluc was quantified at 24 hpi using Nano-Glo luciferase  
256 substrate as per manufacturer's instructions, and a Synergy LX microplate reader and  
257 analyzed using a Gen5 data analysis software (Bio-Tek). To measure mCherry signal,  
258 cells infected with rSARS-CoV-2/mCherry or rSARS-CoV-2/mCherry-Nluc were fixed in  
259 10% neutral buffered formalin overnight and washed with PBS before quantified in a  
260 Synergy LX microplate reader. For cells infected with rSARS-CoV-2/WT, plaques were  
261 detected using the anti-N MAb 1C7C7 as indicated above and quantified using an  
262 ImmunoSpot Analyzer (CTL). Total viral infection (100%) was determined from the  
263 number of plaques, fluorescence and luciferase values obtained from virus-infected cells  
264 without the 1212C2 hMAb. Viral infection means and SD values were calculated from  
265 quadruplicate individual wells of three independent experiments with Microsoft Excel  
266 software. Non-linear regression curves and 50% neutralization titer (NT<sub>50</sub>) values were  
267 determined using GraphPad Prism Software (San Diego, CA, USA, V. 8.2.1).

268 Inhibition of SARS-CoV-2 in antiviral assays was conducted as previously described  
269 (45, 69). Briefly, Vero E6 cells (4 x 10<sup>4</sup> cells/well, 96-well plate format, quadruplicates)  
270 were infected with 100-200 PFUs/well of rSARS-CoV-2/WT, rSARS-CoV-2/mCherry,  
271 rSARS-CoV-2/Nluc, or rSARS-CoV-2/mCherry-Nluc and incubated at 37°C for 1 h.  
272 Afterwards, the virus inoculum was removed and replaced with post-infection media  
273 containing 3-fold serial dilutions of remdesivir (starting concentration of 100 µM) and cells  
274 were incubated at 37°C in a 5% CO<sub>2</sub> incubator. Cells infected with rSARS-CoV-2/WT  
275 were overlaid with 1% Avicel as previously described (69). After 24 hpi, Nluc activity from  
276 cell culture supernatants infected with rSARS-CoV-2/Nluc or rSARS-CoV-2/mCherry-

277 Nluc was determined using Nano-Glo luciferase substrate and a Synergy LX microplate  
278 reader. For cells infected with rSARS-CoV-2/mCherry or rSARS-CoV-2/mCherry-Nluc,  
279 mCherry expression was quantified in a Synergy LX microplate reader. Lastly, rSARS-  
280 CoV-2/WT was detected using the anti-N MAb 1C7C7 and quantified using an  
281 ImmunoSpot Analyzer (CTL). Total viral infection (100%) was calculated from number of  
282 plaques, fluorescence, and luciferase values of infected cells in the absence of  
283 remdesivir. Means and SD values were calculated from quadruplicates from three  
284 independent experiments with Microsoft Excel software. The 50% effective concentration  
285 (EC<sub>50</sub>) was calculated by sigmoidal dose-response curves on GraphPad Prism (San  
286 Diego, CA, USA, Version 8.2.1).

### 287 **Mice experiments**

288 Female 4-6 weeks old K18 hACE2 transgenic mice [B6.Cg-Tg(K18-ACE2)2PrImn/J,  
289 The Jackson laboratory] were maintained in the animal care facility at Texas Biomedical  
290 Research Institute under specific pathogen-free conditions. For viral infections, groups of  
291 mice were anesthetized with gaseous isoflurane and inoculated intranasally with the  
292 indicated viruses. A separate group of K18 hACE2 transgenic mice were also mock-  
293 infected with PBS and served as a negative control.

294 For body weight and survival studies, K18 hACE2 transgenic mice (n=4) were  
295 intranasally infected with 10<sup>5</sup> PFUs/mouse of the indicated viruses and monitored daily  
296 for body weight loss and survival to assess morbidity and mortality, respectively, over a  
297 period of 12 days. Mice that were below 75% of their initial body weight were considered  
298 to have reached their experimental endpoint and were humanly euthanized.

299 *In vivo* bioluminescence imaging of live mice (n=4) was conducted with an Ami HT *in*  
300 *vivo* imaging system (IVIS; Spectral Instruments) at 1, 2, 4, and 6 days post-infection  
301 (DPI). At each time points, mice were anesthetized with isoflurane and retro-orbitally  
302 injected with 100  $\mu$ l of Nano-Glo luciferase substrate diluted by 1:10 in PBS. Mice were  
303 immediately placed in an isolation chamber and imaged using the Ami HT IVIS. Radiance  
304 within the region of interest (ROI) of each mouse was analyzed using the Aura software  
305 (Spectral Instruments) and total flux values (photons/s) were normalized to background  
306 signal of mock-infected control.

307 To access fluorescence expression in the lungs and to determine viral titers, a  
308 separate cohort of mice (n=4) were similarly infected with the indicated recombinant  
309 viruses and were humanely euthanized at 2 and 4 DPI after *in vivo* imaging. Lungs were  
310 surgically excised, washed in PBS, and fluorescent and brightfield images were obtained  
311 using an Ami HT IVIS and an iPhone 6s (Apple), respectively. Fluorescence signal  
312 (radiance efficiency) around the ROI of the lungs were quantified using the Aura software  
313 and mean values were normalized to the autofluorescence of mock-infected lungs. The  
314 macroscopic pathology score was determined in a blinded manner by a certified  
315 pathologist from brightfield images of the lungs, in which the percent of total surface area  
316 of lungs affected by consolidation, lesions, congestion, and/or atelectasis was quantified  
317 with NIH ImageJ software as previously described (58, 71). Nasal turbinate and brains  
318 were also collected, and tissues were individually homogenized in 1 ml of PBS using a  
319 Precellys tissue homogenizer (Bertin Instruments). Tissue homogenates were  
320 centrifuged at 12,000  $\times$  g at 4°C for 5 min to pellet cell debris, and supernatants were  
321 collected. Viral titers were determined by plaque assay and immunostaining as described

322 above. Nluc activity in the tissue homogenates were determined using Nano-Glo  
323 luciferase substrate kit and a Synergy LX microplate reader.

### 324 **Hamster experiments**

325 Female 4-6 weeks old golden Syrian hamsters (*Mesocricetus auratus*) were  
326 purchased from Charles River Laboratories and maintained in the animal care facility at  
327 Texas Biomedical Research Institute under specific pathogen-free conditions. For viral  
328 infections, hamsters were anesthetized with isoflurane and intranasally infected with  
329 rSARS-CoV-2/mCherry-Nluc. One day later, infected hamsters were transferred to cages  
330 containing contact naïve hamsters. A separate group of hamsters were also mock-  
331 infected with PBS and served as a negative control.

332 *In vivo* bioluminescence imaging of live hamsters (n=4) was conducted with an Ami  
333 HT IVIS on 2, 4 and 6 DPI. Hamsters were anesthetized with gaseous isoflurane in an  
334 isolation chamber, and Nano-Glo luciferase substrate was diluted 1:10 in PBS and retro-  
335 orbitally injected into each animal (200  $\mu$ l). Immediately after, hamsters were secured in  
336 the isolation chamber and imaged with an Ami HT IVIS and bioluminescence analyses  
337 were performed. The total flux values were obtained around the ROI of each hamster and  
338 normalized to mock-infected hamsters. Next, hamsters were euthanized, and mCherry  
339 expression in excised lungs were imaged in an Ami HT IVIS. The Aura software was used  
340 to determine the radiant efficiency of the ROI. Fluorescence signal obtained from infected  
341 or contact lungs were normalized to mock-infected lungs. Brightfield images of lungs were  
342 taken using an iPhone 6s and were used to assess the pathology score in a blinded  
343 manner. A trained pathologist determined the percent of lung surface that was affected  
344 by lesions, congestion, consolidation, and/or atelectasis using NIH ImageJ (58, 71). Along

345 with the lungs, nasal turbinate were excised and homogenized in PBS using a Precellys  
346 tissue homogenizer at 12,000 x *g* for 5 min. Supernatants were collected and used to  
347 determine viral titers and NIuc activity as described above.

### 348 **Statistical analysis**

349 All data are presented as mean values and SD for each group and were analyzed  
350 using Microsoft Excel software. A one-way ANOVA or student t-test was used for  
351 statistical analysis on GraphPad Prism or Microsoft Word software, respectively. \*,  $p <$   
352 0.05; \*\*,  $p < 0.01$ ; \*\*\*,  $p < 0.001$ ; \*\*\*\*,  $p < 0.0001$ ; and ns, no significance.

353

354

355

356

357

358

359

360

361

362

363

364

365

366

367



## 368 **RESULTS**

### 369 **Generation of rSARS-CoV-2/mCherry-Nluc**

370 Recently, we have generated rSARS-CoV-2 expressing single reporter genes  
371 upstream of the viral N gene using a PTV-1 2A autoproteolytic peptide approach (23).  
372 These new rSARS-CoV-2 displayed higher levels of reporter gene expression than those  
373 previously described in which the reporter gene substitutes the viral ORF7a protein (43-  
374 45). To generate a rSARS-CoV-2 expressing two reporter genes, mCherry and Nluc, we  
375 implemented a similar method and inserted a fusion sequence of mCherry-Nluc, and the  
376 PTV-1 2A autoproteolytic peptide, upstream of the SARS-CoV-2 N gene in the BAC  
377 containing a full length copy of the SARS-CoV-2 genome (**Figure 1A**), and rescued  
378 rSARS-CoV-2/mCherry-Nluc using our previously described protocol (44, 58). To assess  
379 whether mCherry expression could be directly visualized by fluorescence microscopy,  
380 Vero E6 cells were mock-infected or infected (MOI 0.01) with rSARS-CoV-2/WT, rSARS-  
381 CoV-2/mCherry, rSARS-CoV-2/Nluc, or rSARS-CoV-2/mCherry-Nluc (**Figure 1B**). At 24  
382 hpi, cells were fixed and mCherry expression was directly assessed under a fluorescence  
383 microscope, which showed high mCherry fluorescence expression in cells infected with  
384 rSARS-CoV-2/mCherry or rSARS-CoV-2/mCherry-Nluc, but not in cells infected with  
385 rSARS-CoV-2/WT or rSARS-CoV-2/Nluc (**Figure 1B**). Further, viral infection was  
386 detected by indirect immunofluorescence microscopy using an anti-N protein 1C7C7 MAbs  
387 (**Figure 1B**). As expected, all Vero E6 cells infected with the different rSARS-CoV-2  
388 mutants, but not mock-infected cells, were positive for the presence of the virus.  
389 Expression of mCherry and Nluc reporter genes were also confirmed by Western blot  
390 (**Figure 1C**). As expected, mCherry was readily detected in whole cell lysates from Vero

391 E6 cells infected with rSARS-CoV-2/mCherry or rSARS-Cov-2/mCherry-Nluc but not in  
392 those infected with rSARS-CoV-2/WT or rSARS-CoV-2/Nluc; or mock-infected (**Figure**  
393 **1C**). Likewise, Nluc was detected only in cell extracts from rSARS-CoV-2/Nluc and  
394 rSARS-CoV-2/mCherry-Nluc infected cells and not in those infected with rSARS-CoV-  
395 2/WT or rSARs-CoV-2/mCherry; or mock-infected (**Figure 1C**). A specific band for the  
396 viral N protein appeared in all the virus-infected cell extracts, but not in mock-infected  
397 Vero E6 cell extracts, all of which showed comparable protein levels of N protein  
398 expression (**Figure 1C**). The identity of the double reporter-expressing rSARS-CoV-  
399 2/mCherry-Nluc was further validated by next generation sequencing (**Figure 1D**). The  
400 rSARS-CoV-2/mCherry and rSARS-CoV-2/Nluc were also sequenced as reference  
401 controls. We found two non-reference alleles with a frequency greater than 10% in  
402 rSARS-CoV-2/mCherry in the viral N (C752T) and envelope, E (V5A) proteins (**Figure**  
403 **1D**, top). Likewise, we identified two amino acid changes in the rSARS-CoV-2/Nluc S  
404 (H655Y) and E (S6L) proteins (**Figure 1D**, middle). No amino acid changes were found  
405 in rSARS-CoV-2/mCherry-Nluc compared to the reference viral genome (**Figure 1D**,  
406 bottom), indicating that rSARS-CoV-2/mCherry-Nluc resembles the sequence of rSARS-  
407 CoV-2/WT apart from the insertion of the mCherry-Nluc reporter gene fusion and the PTV-  
408 1 2A autoproteolytic site.

#### 409 ***In vitro* characterization of rSARS-CoV-2/mCherry-Nluc**

410 Since the cloning of two reporter genes as a fusion protein could affect viral fitness  
411 and/or reporter gene expression, we examined the viral fitness of rSARS-CoV-2/mCherry-  
412 Nluc in cultured cells by assessing growth kinetics and compared them to those of rSARS-  
413 CoV-2 expressing single reporter gene (e.g. rSARS-CoV-2/mCherry and rSARS-CoV-

414 2/Nluc) or rSARS-CoV-2/WT (**Figure 2A**). Vero E6 cells were infected at an MOI of 0.01  
415 and viral titers in cell culture supernatants were quantified at different time points. No  
416 significant difference in replication kinetics were found between all the indicated viruses,  
417 except for rSARS-CoV-2/Nluc, which replicated slightly slower (**Figure 2A**). Conversely,  
418 rSARS-CoV-2/mCherry-Nluc reached a high titer of  $10^7$  PFU/ml by 24-48 hpi like rSARS-  
419 Co-2/WT and rSARS-CoV-2/mCherry, suggesting that the expression of the double  
420 reporter fused mCherry-Nluc gene did not affect viral fitness in Vero E6 cells (**Figure 2A**).  
421 In parallel, Nluc and mCherry expression were evaluated over a period of 96 h by either  
422 assessing Nluc activity in cell culture supernatants (**Figure 2B**) or by fluorescence  
423 microscopy (**Figure 2C**). Vero E6 cells were similarly infected (MOI 0.01) and Nluc activity  
424 in cell culture supernatants were quantified at different time points. We found Nluc activity  
425 steadily increased beginning at 12 hpi and peaked at 72 hpi, then decreased at 96 hpi  
426 (**Figure 2B**). No Nluc activity was detected in cell culture supernatants from mock-  
427 infected or Vero E6 cells infected with rSARS-CoV-2/WT or rSARS-CoV-2/mCherry  
428 (**Figure 2B**). Similarly, mCherry expression was detected as early as 12 hpi and  
429 increased in a time dependent matter until 72 hpi (**Figure 2C**). At 96 hpi, mCherry  
430 expression was lightly reduced, which coincided with the decrease in Nluc activity and  
431 viral titers at the same time point most likely due to the cytopathic effect (CPE) caused by  
432 viral infection. As expected, no mCherry expression was detected in Vero E6 cells  
433 infected with rSARS-CoV-2/WT or rSARS-CoV-2/Nluc, or mock-infected (not shown).  
434 These results suggest that *in vitro* detection and replication of rSARS-CoV-2/mCherry-  
435 Nluc could be monitored and quantified based on the expression of either Nluc (**Figure**  
436 **2B**) or mCherry (**Figure 2C**) reporter genes.

437 Next, plaque assays were conducted to further corroborate that all rSARS-CoV-  
438 2/mCherry-Nluc viral particles express both mCherry and Nluc reporter genes, and to  
439 evaluate plaque phenotype and compared them to that of rSARS-CoV-2 expressing  
440 individual reporter genes (rSARS-CoV-2/mCherry and rSARS-CoV-2/Nluc), and rSARS-  
441 CoV-2/WT (**Figure 2D**). When plaques were examined by fluorescence microscopy,  
442 mCherry-positive plaques were detected in cells infected with rSARS-CoV-2/mCherry  
443 and rSARS-CoV-2/mCherry-Nluc (**Figure 2D**). Then, Nluc-positive plaques were  
444 detected using an anti-Nluc specific Ab and FITC-conjugated secondary Ab, which only  
445 appeared in cells infected with rSARS-CoV-2/Nluc or rSARS-CoV-2/mCherry-Nluc  
446 (**Figure 2D**). Importantly, when viral plaques were immunostained with an anti-N protein  
447 Ab, they colocalized with mCherry- and/or Nluc-positive plaques (white arrows) in both  
448 Vero E6 cells infected with individual reporter-expressing rSARS-CoV-2/mCherry and  
449 rSARS-CoV-2/Nluc, as well as in double reporter-expressing rSARS-CoV-2/mCherry-  
450 Nluc (**Figure 2D**), demonstrating that all rSARS-CoV-2 plaques contained the reporter  
451 gene(s). Although the overall plaque size phenotype did not vary between the different  
452 viruses, we did observe smaller plaques produced (amongst the normal sized plaques)  
453 in rSARS-CoV-2/mCherry-Nluc experiments (**Figure 2D**).

#### 454 **A double reporter-based neutralization assay for the identification of SARS-CoV-2** 455 **neutralizing antibodies and antivirals**

456 To demonstrate the feasibility of implementing our rSARS-CoV-2/mCherry-Nluc to  
457 identify and characterize neutralizing Abs (NAbs) and antivirals, we developed a double  
458 reporter-based microneutralization assay using 1212C2 hMAb (**Figure 3A**) and  
459 remdesivir (**Figure 3B**), which are described and shown to neutralize or inhibit,

460 respectively, SARS-CoV-2 (72, 73). The neutralization activity of 1212C2 was assessed  
461 by incubating the hMAb with the indicated rSARS-CoV-2 prior to infection of Vero E6  
462 cells, and quantifying Nluc activity in cell culture supernatants (**Figure 3A**, right panel)  
463 and mCherry expression (**Figure 3A**, middle panel) using a microplate reader at 24 hpi.  
464 As internal control, we conducted the microneutralization assay using immunostaining of  
465 rSARS-CoV-2/WT, as previously described (**Figure 3A**, left panel) (69). We determined  
466 the 50% neutralization concentration (NT<sub>50</sub>) of 1212C2 hMAb using sigmoidal dose-  
467 response curves. The NT<sub>50</sub> of 1212C2 hMAb against rSARS-CoV-2/mCherry (2.4 ng) and  
468 rSARS-CoV-2/mCherry-Nluc (2.7 ng) as determined by fluorescent mCherry expression  
469 were similar to that of rSARS-CoV-2/WT (3 ng) using a classical immunostaining assay,  
470 and those reported with the SARS-CoV-2 WA-1 natural isolate (44, 72). Moreover, NT<sub>50</sub>  
471 values of 1212C2 hMAb against rSARS-CoV-2/Nluc or rSARS-CoV-2/mCherry-Nluc  
472 determined by Nluc expression (3.0 and 2.0 ng, respectively) were also comparable to  
473 those of rSARS-CoV-2/WT (3 ng). To determine whether rSARS-CoV-2/mCherry-Nluc  
474 could also be used to assess the effectiveness of antivirals, we quantified the Nluc activity  
475 (**Figure 3B**, right panel) and mCherry expression (**Figure 3B**, middle panel) in Vero E6  
476 cells infected with the single and double reporter-expressing rSARS-CoV-2 in the  
477 presence of serial 3-fold dilutions of remdesivir. As before, we also included rSARS-CoV-  
478 2/WT infected cells stained with the MAb against the viral N protein as internal control  
479 (**Figure 3B**, left panel). Sigmoidal dose-response curves were developed from reporter  
480 expression values and used to calculate the 50% effective concentration (EC<sub>50</sub>). The  
481 EC<sub>50</sub> values of remdesivir against the indicated viruses were similar to each other,  
482 regardless of whether the microneutralization assay used immunostaining (rSARS-CoV-

483 2/WT, 2  $\mu$ M; left panel), fluorescence (rSARS-CoV-2/mCherry, 1.7  $\mu$ M; rSARS-CoV-  
484 2/mCherry-Nluc, 1.5  $\mu$ M; middle panel), or luciferase (rSARS-CoV-2/Nluc, 1.4  $\mu$ M;  
485 rSARS-CoV-2/mCherry-Nluc, 1.5  $\mu$ M; right panel) (**Figure 3B**). Overall, these results  
486 demonstrate the feasibility of using the rSARS-CoV-2 expressing both mCherry and Nluc  
487 reporter genes to reliably and quickly evaluate the neutralizing and inhibitory properties  
488 of NAbs and/or antivirals, respectively, against SARS-CoV-2 based on mCherry and/or  
489 Nluc expression, respectively.

#### 490 **Characterization of rSARS-CoV-2/mCherry-Nluc in K18 hACE2 transgenic mice**

491 Next, we characterized the pathogenicity and ability of rSARS-CoV-2/mCherry-Nluc  
492 to replicate in K18 hACE2 transgenic mice using rSARS-CoV-2 expressing individual  
493 fluorescent and bioluminescent reporter genes (rSARS-CoV-2/mCherry and rSARS-CoV-  
494 2/Nluc, respectively), and rSARS-CoV-2/WT as internal control. One group of mice was  
495 infected with a mixture of rSARS-CoV-2/mCherry and rSARS-CoV-2/Nluc. To assess  
496 pathogenicity, groups of K18 hACE2 transgenic mice (n=4/group) were mock-infected or  
497 infected with  $10^5$  PFUs of the indicated viruses and changes in body weight (**Figure 4A**)  
498 and survival (**Figure 4B**) were monitored for 12 DPI. All mice infected with rSARS-CoV-  
499 2 rapidly lost body weight and succumbed to viral infection (**Figures 4A and 4B**,  
500 respectively). Most importantly, the virulence of rSARS-CoV-2/mCherry-Nluc was shown  
501 to be identical to that of our previously reporter viruses expressing individual mCherry or  
502 Nluc (44), or rSARS-CoV-2/WT (69, 74). These data indicate that expression of the fusion  
503 of mCherry and Nluc from rSARS-CoV-2/mCherry-Nluc does not result in viral attenuation  
504 in K18 hACE2 transgenic mouse model as compared to rSARS-CoV-2/WT.

505 **Tracking viral dynamics of rSARS-CoV-2/mCherry-Nluc infection and pathogenesis**  
506 **in K18 hACE2 transgenic mice**

507 Since our rSARS-CoV-2/mCherry-Nluc expresses both fluorescent (mCherry) and  
508 luciferase (Nluc) reporter genes, we sought to demonstrate the advantage of using this  
509 newly double reporter-expressing rSARS-CoV-2/mCherry-Nluc to track viral replication in  
510 live animals. Thus, K18 hACE2 transgenic mice were mock-infected or infected with  $10^5$   
511 PFU of the indicated rSARS-CoV-2 reporter viruses intranasally and Nluc was monitored  
512 at 1, 2, 4, and 6 DPI (**Figure 5A**). In mice infected with rSARS-CoV-2/Nluc or rSARS-  
513 CoV-2/mCherry-Nluc, or co-infected at the same time with rSARS-CoV-2/Nluc and  
514 rSARS-CoV-2/mCherry, we detected Nluc signal as early as 1 DPI, which increased over  
515 time (**Figure 5A**). Since IVIS was conducted in the same mouse, viral replication and  
516 distribution was followed over time (**Figure 5A**) and bioluminescence intensity around the  
517 chest area of the mice was measured in flux (**Figure 5B**). As expected, Nluc expression  
518 increased over time until mice succumbed to SARS-CoV-2 infection, consistent with  
519 previous literature, including ours (43). Notably, and as expected based on the IVIS  
520 (**Figure 5A**), Nluc expression was only readily detected in K18 hACE2 transgenic mice  
521 infected with rSARS-CoV-2/Nluc, rSARS-CoV-2/mCherry-Nluc, or co-infected with both,  
522 rSARS-CoV-2/mCherry and rSARS-CoV-2/Nluc (**Figure 5B**). No significant differences  
523 in flux were observed between the groups of mice infected with the Nluc-expressing  
524 rSARS-CoV-2 mutants (**Figure 5B**).

525 As luciferase and fluorescence proteins have different properties and could potentially  
526 reveal different readouts as surrogate indicators of viral infection, we next determined and  
527 compared Nluc and mCherry expression during infection *in vivo*. Thus, K18 hACE2

528 transgenic mice (n=4) were mock-infected or infected with rSARS-CoV-2/WT, rSARS-  
529 CoV-2/mCherry, rSARS-CoV-2/Nluc, rSARS-CoV-2/mCherry-Nluc, or co-infected with  
530 rSARS-CoV-2/mCherry and rSARS-CoV-2/Nluc, then on 2 and 4 DPI, Nluc activity in the  
531 entire mouse (**Figures 6A and 6B**) and mCherry expression of whole lungs (**Figures 6C**  
532 **and 6D**) were determined, including the gross pathology score (**Figure 6E**). Like our  
533 previous results (**Figure 5**), an increase in Nluc expression from 2 to 4 DPI was observed  
534 in K18 hACE2 transgenic mice infected with rSARS-CoV-2/Nluc, rSARS-CoV-2/mCherry-  
535 Nluc, or co-infected with rSARS-CoV-2/mCherry and rSARS-CoV-2/Nluc (**Figures 6A**).  
536 These results were further confirmed when we determined the flux in the *in vivo* imaged  
537 mice (**Figures 6B**). After quantifying Nluc expression, the lungs from mock- and rSARS-  
538 CoV-2-infected K18 hACE2 transgenic mice were excised and imaged in the IVIS to  
539 determine and quantify mCherry expression (**Figures 6C and 6D**, respectively). We only  
540 observed detectable levels of mCherry expression in the lungs of K18 hACE2 transgenic  
541 mice infected with rSARS-CoV-2/mCherry, rSARS-coV-2/mCherry-Nluc, or co-infected  
542 with both rSARS-CoV-2/mCherry and rSARS-coV-2/Nluc (**Figures 6C and 6D**). Notably,  
543 levels of mCherry expression, like those of Nluc were comparable in the lungs of K18  
544 hACE2 transgenic mice infected with the double reporter-expressing rSARS-CoV-  
545 2/mCherry-Nluc than those infected with the single rSARS-CoV-2/Nluc, or co-infected  
546 with rSARS-CoV-2/mCherry and rSARS-CoV-2/Nluc (**Figures 6C and 6D**). Correlating  
547 with *in vivo* and *ex vivo* imaging of the lungs, gross lung pathology scores were  
548 comparable in all rSARS-CoV-2-infected K18 hACE2 transgenic mice and more  
549 significant at 4 DPI (**Figure 6E**).



550 Both Nluc activity and viral titers peaked at 2 DPI in the nasal turbinate of mice infected  
551 with rSARS-CoV-2/Nluc, rSARS-CoV-2/mCherry-Nluc, or co-infected with rSARS-CoV-  
552 2/mCherry and rSARS-CoV-2/Nluc (**Figures 7A and 7B**, left panels) However, in the  
553 lungs, Nluc activity remained the same at 2 and 4 DPI, while viral titers decreased at 4  
554 DPI as compared to 2 DPI (**Figures 7A and 7B**, middle panels). Nluc activity in brain  
555 homogenates was only evident in the samples from mice infected with rSARS-CoV-  
556 2/Nluc, rSARS-CoV-2/mCherry-Nluc, or both rSARS-CoV-2/mCherry and rSARS-CoV-  
557 2/Nluc and signals increased in a time dependent matter (**Figure 7A**, right panel).  
558 Consistent with previous studies, we were only able to detect SARS-CoV-2 in the brain  
559 of two of the four mice infected with rSARS-CoV-2/mCherry-Nluc at 4 DPI (**Figure 7B**,  
560 right panel) (43). Altogether, these findings demonstrate the feasibility to assess viral  
561 infection *in vivo* in the entire mice by bioluminescence (Nluc), and *ex vivo* in the lungs of  
562 infected mice by fluorescence (mCherry) with our double reporter-expressing rSARS-  
563 CoV-2/mCherry-Nluc and that the mCherry-Nluc fusion does not have a significant impact  
564 in the pathogenesis and replication of the virus in K18 hACE2 transgenic mice, showing  
565 similar levels of Nluc or mCherry reporter gene expression than those of rSARS-CoV-2  
566 expressing individual bioluminescence or fluorescence proteins. Notably, viral titers of  
567 rSARS-CoV-2 mCherry-Nluc in the nasal turbinate and lungs were comparable to those  
568 of a rSARS-CoV-2/WT.

#### 569 **Assessment of SARS-CoV-2 infection and transmission in golden Syrian hamsters**

570 To demonstrate the feasibility of using our double reporter rSARS-CoV-2/mCherry-  
571 Nluc to assess viral replication and transmission, golden Syrian hamsters (n=4) were  
572 mock-infected or infected with  $10^5$  PFU/hamster of rSARS-CoV-2/mCherry-Nluc. The day

573 after infection, non-infected naïve contact hamsters were placed in the same cage with  
574 infected hamsters. On 2, 4, and 6 DPI Nluc expression in the entire hamsters were  
575 evaluated by IVIS, like in our previous studies using K18 hACE2 transgenic mice. Infected  
576 hamsters presented detectable levels of Nluc expression in both the nasal turbinate and  
577 lungs at 2 and 4 DPI that decreased at 6 DPI (**Figure 8A**). In contrast, contact hamsters  
578 had little to no Nluc signal on 2 DPI that drastically increased on 4 and 6 DPI (**Figure 8A**).  
579 The temporal and spatial differences in Nluc signal between originally infected and  
580 contact hamsters is most likely due to the route of transmission/infection and the time  
581 frame in which the contact hamsters were exposed to the originally infected hamsters.  
582 These initial IVIS results were further confirmed by quantification of bioluminescence in  
583 hamsters (**Figure 8B**) that showed a decrease in flux in infected hamsters from 2 to 6  
584 DPI and an increase from 2 to 4 DPI and then decreased on 6 DPI in contact hamsters  
585 (**Figure 8B**). Subsequently, lungs were excised and imaged in the IVIS for Nluc and  
586 mCherry expression (**Figure 8C**). Nluc and mCherry levels of expression correlate  
587 between them and with that observed by IVIS in the whole hamster, revealing a time-  
588 dependent effect in reporter expression in both infected and contact hamsters that  
589 correlate with the levels observed by IVIS (**Figure 8D**). Gross pathology scores in the  
590 lungs of infected and contact hamsters were determined from brightfield images with  
591 increased scores over time in both infected and contact animals (**Figure 8E**).

592 Finally, nasal turbinate and lungs from mock and originally infected or contact  
593 hamsters were processed to determine Nluc activity (**Figure 9A**) and viral titers (**Figure**  
594 **9B**). In the nasal turbinate of originally infected hamsters, both Nluc activity and viral titers  
595 decreased from 2 to 6 DPI, while in contact hamsters, a time-dependent increase was

596 observed (**Figures 9A and 9B**, respectively). A similar trend between Nluc signal and  
597 viral titers were observed in the lungs of originally infected and contact hamsters. Notably,  
598 Nluc signal and viral titers from both groups of infected and contact hamsters correlated  
599 with bioluminescence intensity from whole animals and excised lungs (**Figure 8**). Based  
600 on these results with rSARS-CoV-2/mCherry-Nluc, viral infection can be monitored in  
601 hamsters solely using reporter expression that correlates well with levels of viral  
602 replication. Moreover, rSARS-CoV-2 transmission from originally infected to contact  
603 hamsters can be easily tracked *in vivo* in the whole animal or *ex vivo* in the lungs (**Figure**  
604 **8**), and results correlate with those of viral replication (**Figure 9**).

605

606

607

608

609

610

611

612

613

614

615

616

617

618

619 **DISCUSSION**

620 Replication-competent, reporter-expressing, recombinant viruses have been  
621 previously shown to represent an excellent approach to study, among others, viral  
622 infection, replication, pathogenesis, and transmission (19-29). We and others have  
623 described the feasibility of generating rSARS-CoV-2 expressing reporter genes encoding  
624 either fluorescent or luciferase proteins (36, 43, 44, 46, 47). These reporter-expressing  
625 replication-competent rSARS-CoV-2 can be used to assess the prophylactic activity of  
626 vaccines and/or the therapeutic potential of NAbs or antivirals (45, 69). Moreover, these  
627 rSARS-CoV-2 expressing fluorescent or luciferase proteins represent an excellent option  
628 to study the biology of SARS-CoV-2 in cultured cells and/or in validated small animals of  
629 infection (44, 45, 47). Moreover, we have described a new approach to express reporter  
630 genes from the locus of the viral N protein using a 2A autoproteolytic system where levels  
631 of fluorescent or luciferase expression are higher than those where the reporter gene  
632 substitutes the viral ORF7a (43, 44). This new 2A strategy to express the reporter gene  
633 from the viral N protein locus does not require deleting the viral ORF7a (43, 44). However,  
634 these previously described reporter-expressing replication-competent rSARS-CoV-2 only  
635 express a single fluorescent or a luciferase protein and, therefore, their experimental  
636 applications are limited to the properties of one specific reporter gene and available  
637 equipment (43, 44).

638 Using our previously described BAC-based reverse genetics (19, 57), we generated  
639 a rSARS-CoV-2 expressing a fusion of the fluorescent mCherry protein to the  
640 bioluminescence Nluc protein (rSARS-CoV-2/mCherry-Nluc) upstream of the viral N  
641 protein separated by the PTV-1 2A autoproteolytic cleavage site, thereby allowing

642 separate expression of the mCherry-Nluc fusion and the viral N protein (43, 44).  
643 Expression of both reporter genes was validated by fluorescence microscopy (mCherry)  
644 or by luciferase activity with a microplate reader (Nluc). We further confirmed reporter  
645 expression by Western blot, where a specific band was detected for the mCherry-Nluc  
646 fusion polyprotein. In cell culture, rSARS-CoV-2/mCherry-Nluc displayed growth kinetics  
647 similar to those of rSARS-CoV-2 expressing individual mCherry (rSARS-CoV-2/mCherry)  
648 or Nluc (rSARS-CoV-2/Nluc), or a rSARS-CoV-2 lacking reporter genes (rSARS-CoV-  
649 2/WT). Likewise, the plaque phenotype of the novel rSARS-CoV-2/mCherry-Nluc were  
650 similar in size to those of rSARS-CoV-2/mCherry, rSARS-CoV-2/Nluc, or rSARS-CoV-  
651 2/WT but only rSARS-CoV-2/mCherry-Nluc had detectable levels of expression of both  
652 reporter genes. Importantly, levels of mCherry or Nluc reporter expression correlated with  
653 the levels of viral replication, further supporting the concept of reporter genes being a  
654 valid surrogate to study viral infection.

655 Based on the advantages of using a rSARS-CoV-2 expressing both a fluorescent and  
656 a bioluminescence protein over those expressing either fluorescence or luciferase  
657 reporter genes, we developed a bireporter-based microneutralization assay to identify  
658 and characterize NABs as well as antivirals. Importantly,  $NT_{50}$  (NABs) and  $EC_{50}$  (antivirals)  
659 values obtained in bireporter-based microneutralization assays using either fluorescence  
660 or luciferase signal were comparable to those obtained with rSARS-CoV-2 expressing  
661 individual mCherry (rSARS-CoV-2/mCherry) or Nluc (rSARS-CoV-2/Nluc) reporter  
662 genes, or rSARS-CoV-2/WT, and those reported previously in the literature (22, 43, 44,  
663 46). Overall, the bireporter rSARS-CoV-2 represents an excellent option in circumstances  
664 where fluorescence or luciferase is negated by the properties of an antiviral drug (such as

665 fluorescing chemical entities in certain small molecule compounds) or the host cell being  
666 studied (44, 69). Moreover, although in this report the bireporter-based  
667 microneutralization assay was performed in 96-well plates, it can be easily adapted to a  
668 384-well format for high-throughput screenings (HTS) to identify NABs or antivirals using  
669 a double reporter screening approach based on expression of both fluorescent mCherry  
670 and luciferase Nluc. In this instance, having two reporters allows HTS to have the option  
671 to use either reporters, or both, to further validate neutralization results.

672 One of the major limitations of recombinant viruses expressing reporter genes is their  
673 potential attenuation *in vivo* (37). To assess whether expression of mCherry fused to Nluc  
674 affected SARS-CoV-2 replication *in vivo*, we infected K18 hACE2 transgenic mice and  
675 golden Syrian hamsters with rSARS-CoV-2/mCherry-Nluc. Despite encoding a fusion of  
676 two reporter genes from the locus of the viral N protein, rSARS-CoV-2/mCherry-Nluc  
677 displayed similar virulence as determined by changes in body weight and survival in K18  
678 hACE2 transgenic mice as rSARS-CoV-2 expressing individual fluorescent (rSARS-CoV-  
679 2/mCherry) or luciferase genes (rSARS-CoV-2/Nluc), or rSARS-CoV-2/WT. Importantly  
680 we traced viral infection in the same animal over a period of 6 days based on Nluc  
681 expression. We were able to detect both luciferase and fluorescent expression in the  
682 lungs of mice infected with rSARS-CoV-2/mCherry-Nluc; and mCherry or Nluc expression  
683 levels in the lungs of infected mice were comparable to those observed in mice infected  
684 with rSARS-CoV-2/mCherry or rSARS-CoV-2/Nluc, or co-infected with both rSARS-CoV-  
685 2/mCherry and rSARS-CoV-2/Nluc, or rSARS-CoV-2/WT. Notably, rSARS-CoV-  
686 2/mCherry-Nluc replicated in the nasal turbinate, lungs, and brain of infected K18 hACE2  
687 transgenic mice to levels comparable to recombinant viruses expressing individual

688 reporter genes (rSARS-CoV-2/mCherry or rSARS-CoV-2/Nluc) and those of rSARS-CoV-  
689 2/WT. Similar results were also observed in the golden Syrian hamster model of SARS-  
690 CoV-2 infection and transmission (19, 70). Importantly, in the case of hamsters, we were  
691 able to track viral infection and transmission in infected and contact hamsters,  
692 respectively, demonstrating the feasibility of using our double reporter-expressing  
693 rSARS-CoV-2/mCherry-Nluc in transmission studies in hamsters.

694 In summary, we have generated a rSARS-CoV-2 expressing simultaneously two  
695 reporter genes that is suitable for multiple experimental applications currently not  
696 available with the use of rSARS-CoV-2 expressing a single fluorescent or luciferase  
697 reporter gene. This rSARS-CoV-2/mCherry-Nluc virus is, to our knowledge, the first  
698 replication-competent rSARS-CoV-2 stably expressing two reporter genes. The feasibility  
699 of generating rSARS-CoV-2 expressing a fusion of two reporter genes demonstrates the  
700 plasticity of the viral genome to express large ORFs from the locus of the viral N protein.  
701 Moreover, the robust levels of reporter gene expression obtained using this 2A  
702 autoproteolytic approach and the feasibility of expressing foreign genes without the need  
703 of removing a viral protein (e.g. ORF7a) represent an ideal option for the use of rSARS-  
704 CoV-2/mCherry-Nluc to study viral infection, pathogenesis and transmission, including  
705 newly identified VoC.

706

707

708

709

710

711 **ACKNOWLEDGEMENTS**

712 We are grateful to Dr. Thomas Moran at The Icahn School of Medicine at Mount Sinai  
713 for providing the SARS-CoV cross-reactive 1C7C7 N protein MAb. Research on SARS-  
714 CoV-2 in L.M-S laboratory was partially supported by grants W81XWH2110103 and  
715 W81XWH2110095 from the Department of Defense (DoD) Peer Reviewed Medical  
716 Research Program (PRMRP); 1R43AI165089-01, 1R01AI161363-01 and  
717 1R01AI161175-01A1 from the National Institute of Health (NIH); by the Center for  
718 Research on Influenza Pathogenesis (CRIP), one of the National Institute of Allergy and  
719 Infectious Diseases (NIAID) funded Centers of Excellence for Influenza Research and  
720 Response (CEIRR; contract # 75N93021C00014); the San Antonio Partnership for  
721 Precision Therapeutics, and the San Antonio Medical Foundation. Research in L.M-S was  
722 also partially supported by NIH R01AI145332, R01AI142985, R01AI141607; and by the  
723 DoD W81XWH1910496.

724

725

726

727

728

729

730

731

732

733



734 **FIGURE LEGENDS**

735 **Figure 1. Generation of a bireporter rSARS-CoV-2 expressing mCherry and Nluc**  
736 **(rSARS-CoV-2/mCherry-Nluc). A) Schematic representation of the rSARS-CoV-**  
737 **2/mCherry-Nluc viral genome:** SARS-CoV-2 structural, non-structural, and accessory  
738 open reading frame (ORF) proteins are indicated in white boxes. mCherry (red), Nluc  
739 (blue) and the PTV-1 2A autoproteolytic sequence (black) were inserted in front of the  
740 viral N protein. **B) mCherry expression and immunofluorescence assays:** Vero E6  
741 cells ( $1.2 \times 10^6$  cells/well, 6-well format, triplicates) were mock-infected or infected (MOI  
742 0.01) with rSARS-CoV-2 WT, rSARS-CoV-2/mCherry, rSARS-CoV-2/Nluc, or rSARS-  
743 CoV-2/mCherry-Nluc. Cells were fixed in 10% neutral buffered formalin 24 hpi before  
744 directly visualizing mCherry expression under a fluorescence microscope or the viral N  
745 protein using a specific 1C7C7 MAb. Cell nuclei were stained with DAPI. Representative  
746 images are shown. Scale bars = 100  $\mu$ m. Magnification = X20. **C) Western blots:** Vero  
747 E6 cells ( $1.2 \times 10^6$  cells/well, 6-well format, triplicates) were mock-infected or infected  
748 (MOI 0.01) with rSARS-CoV-2 WT, rSARS-CoV-2/mCherry, rSARS-CoV-2/Nluc, or  
749 rSARS-CoV-2/mCherry-Nluc. At 24 hpi, cells were collected and protein expression in cell  
750 lysates were evaluated by Western blot using specific antibodies against SARS-CoV-2 N  
751 protein, or the mCherry and Nluc reporter proteins. Tubulin was included as a loading  
752 control. The molecular mass of proteins is indicated in kilodaltons (kDa) on the left. **D)**  
753 **Deep sequencing analysis of reporter-expressing rSARS-CoV-2:** The non-reference  
754 allele frequency of rSARS-CoV-2/mCherry (top), rSARS-CoV-2/Nluc (middle), and  
755 rSARS-CoV-2/mCherry-Nluc (bottom) was calculated by comparing the short reads to the  
756 respective reference SARS-CoV-2 WA-1 viral genome (MN985325.1). Non-reference

757 alleles present in less than 10% of reads are not shown (dotted line) and the non-  
758 reference allele frequency that is greater than 10% is indicated.

759 **Figure 2. *In vitro* characterization of the bireporter rSARS-CoV-2/mCherry-Nluc**

760 **virus. A) Viral growth kinetics:** Viral titers (PFU/ml) in the cell culture supernatants of  
761 Vero E6 cells ( $1.2 \times 10^6$  cells/well, 6-well format, triplicates) infected (MOI 0.01) with  
762 rSARS-CoV-2 WT (WT), rSARS-CoV-2/mCherry (mCherry), rSARS-CoV-2/Nluc (Nluc),  
763 or rSARS-CoV-2/mCherry-Nluc (mCherry-Nluc) at the indicated time points post-infection  
764 were determined by plaque assay. Data represents the mean values and SD of triplicates.

765 LOD, limit of detection. **B) Nluc activity:** Nluc activity in the cell culture supernatants  
766 obtained from the experiment in panel A is represented in relative light units (RLU). **C)**

767 **mCherry expression kinetics:** Vero E6 cells ( $1.2 \times 10^6$  cells/well, 6-well format,  
768 triplicates) were infected (MOI 0.01) with rSARS-CoV-2 WT, rSARS-CoV-2/mCherry,  
769 rSARS-CoV-2/Nluc, or rSARS-CoV-2/mCherry-Nluc and mCherry expression was  
770 directly visualized under a fluorescence microscope at the indicated times post-infection.

771 Representative images are shown. Scale bars = 300  $\mu$ m. Magnification = X10. **D) Plaque**

772 **phenotype:** Viral plaques from Vero E6 cells ( $2 \times 10^5$  cells/well, 24-well plate format,  
773 triplicates) infected with rSARS-CoV-2 WT, rSARS-CoV-2/mCherry, rSARS-CoV-2/Nluc,

774 or rSARS-CoV-2/mCherry-Nluc at 3 DPI were observed under a fluorescence imaging  
775 system (first column, red filter), fluorescently stained with an antibody against Nluc

776 (second column, FITC), or immunostaining with an antibody against the viral N protein  
777 (third column, N). White arrowheads depict the overlapping signal of mCherry

778 fluorescence (left), Nluc bioluminescence (middle), and immunostaining of the viral N

779 protein (right) in Vero E6 cells infected with rSARS-CoV-2/mCherry, rSARS-CoV-2/Nluc,  
780 or rSARS-CoV-2/mCherry-Nluc. ns, not significant. \*,  $P < 0.05$ ; \*\*,  $P < 0.01$ .

781 **Figure 3. Bireporter-based microneutralization assay to identify NAbS and**  
782 **antivirals against SARS-CoV-2. A) A bireporter microneutralization assay to**

783 **identify NAbS:** Three-fold serial dilutions of the SARS-CoV-2 1212C2 hMAb (starting  
784 concentration of 500 ng) were prepared in post-infection media and incubated with 100-  
785 200 PFUs/well of rSARS-CoV-2 WT (WT), rSARS-CoV-2/mCherry (mCherry), rSARS-  
786 CoV-2/Nluc (Nluc), or rSARS-CoV-2/mCherry-Nluc (mCherry-Nluc) for 1 h at  
787 RT. Vero E6 cells (96-well plate format,  $4 \times 10^4$  cells/well, quadruplicates) were infected  
788 and incubated with the virus-antibody mixture at 37° C for 24 h. Viral neutralization was  
789 determined by immunostaining using an anti-N protein MAb (1C7C7) for rSARS-CoV-  
790 2/WT (left) or by fluorescence expression for rSARS-CoV-2/mCherry and rSARS-CoV-  
791 2/mCherry-Nluc (middle), or bioluminescence for rSARS-CoV-2/Nluc and rSARS-CoV-  
792 2/mCherry-Nluc (right) using a microplate reader. The 50% neutralization titer (NT<sub>50</sub>) was  
793 calculated using sigmoidal dose-response curves on GraphPad Prism. Viral  
794 neutralization was normalized to wells containing infected cells without the 1212C2 hMAb.

795 The dotted line indicates 50% virus inhibition. Data are represented by the mean values  
796 and SD of quadruplicates. **B) A bireporter microneutralization assay to assess**

797 **antivirals:** Vero E6 cells (96-well plate format,  $4 \times 10^4$  cells/well, quadruplicates) were  
798 infected with 100-200 PFUs of rSARS-CoV-2/WT, or reporter viruses expressing  
799 mCherry, Nluc, or mCherry-Nluc. After 1 h viral absorption, cells were incubated in post-  
800 infection media containing 3-fold serial dilutions of remdesivir (starting concentration of  
801 100  $\mu$ M). Viral inhibition was determined by immunostaining using an anti-N protein MAb

802 (1C7C7) for rSARS-CoV-2/WT (left) or by fluorescence expression for rSARS-CoV-  
803 2/mCherry and rSARS-CoV-2/mCherry-Nluc (middle), or bioluminescence for rSARS-  
804 CoV-2/Nluc and rSARS-CoV-2/mCherry-Nluc (right) using a microplate reader. The 50%  
805 effective concentration (EC<sub>50</sub>) was calculated using sigmoidal dose-response curves on  
806 GraphPad Prism. Viral inhibition was normalized to wells containing infected cells without  
807 remdesivir. The dotted line indicates the 50% virus inhibition. The data is represented by  
808 the mean values and SD of quadruplicates.

809 **Figure 4. Virulence of rSARS-CoV-2/mCherry-Nluc in K18 hACE2 transgenic mice:**

810 Four-to-six-weeks-old female K18 hACE2 transgenic mice (n=4) were mock-infected or  
811 intranasally inoculated with 10<sup>5</sup> PFU/mouse of rSARS-CoV-2 WT (WT), rSARS-CoV-  
812 2/mCherry (mCherry), rSARS-CoV-2/Nluc (Nluc), or the bireporter rSARS-CoV-  
813 2/mCherry-Nluc (mCherry-Nluc). A group of four-to-six-weeks-old female K18 hACE2  
814 transgenic mice (n=4) were also co-infected with rSARS-CoV-2/mCherry and rSARS-  
815 CoV-2/Nluc (mCherry + Nluc). Body weight loss (**A**) and survival (**B**) of mice were  
816 monitored for 12 days after viral infection.

817 **Figure 5. *In vivo* kinetics of rSARS-CoV-2/mCherry-Nluc in K18 hACE2 transgenic**

818 **mice:** Four-to-six-weeks-old female K18 hACE2 transgenic mice (n=4) were mock-  
819 infected or infected intranasally with 10<sup>5</sup> PFU/mouse of rSARS-CoV-2 WT, rSARS-CoV-  
820 2/mCherry, rSARS-CoV-2/Nluc, rSARS-CoV-2/mCherry + rSARS-CoV-2/Nluc, or with  
821 rSARS-CoV-2/mCherry-Nluc (mCherry-Nluc). Nluc activity in the whole mouse at the  
822 indicated DPI was evaluated with an Ami HT *in vivo* imaging system. Representative  
823 images of the same mouse at 1, 2, 4, and 6 DPI are shown (**A**). Means and SD of the  
824 radiance (number of photons per second per square centimeter per steradian

825 [p/second/cm<sup>2</sup>/sr]) and bioluminescence (total flux [log<sub>10</sub> photons per second (p/s)] over  
826 each mouse are shown) (B). ns, not significant. \*\*\*,  $P < 0.001$ .

827 **Figure 6. *In vivo* bioluminescence and *ex vivo* fluorescence in K18 hACE2**  
828 **transgenic mice infected with rSARS-CoV-2/mCherry-Nluc. A) *In vivo* Nluc**  
829 **expression:** Nluc activity in live mice (n=4) mock-infected or infected (10<sup>5</sup> PFU/mouse)  
830 with rSARS-CoV-2 WT, rSARS-CoV-2/mCherry, rSARS-CoV-2/Nluc, rSARS-CoV-  
831 2/mCherry + rSARS-CoV-2/Nluc, or the bireporter rSARS-CoV-2/mCherry-Nluc  
832 (mCherry-Nluc) were determined on 2 and 4 DPI using the Ami HT IVIS. A representative  
833 image of a mouse per time point is shown. **B) Quantification of Nluc signal:** Means and  
834 SD of the radiance (number of photons per second per square centimeter per steradian  
835 [p/second/cm<sup>2</sup>/sr]) and bioluminescence (total flux [log<sub>10</sub> photons per second (p/s)] of  
836 mock and infected mice is shown. **C) *Ex vivo* mCherry expression:** Excised lungs from  
837 mock-infected or infected mice from panel A were monitored for mCherry fluorescent  
838 expression (FL, top) and bright field (BF, bottom) at 2 and 4 DPI. Representative lung  
839 images from the same mouse used in panel A are shown. **D) Quantification of mCherry**  
840 **expression:** The mean values of mCherry signal around the regions of interest were  
841 normalized to the autofluorescence of mock-infected lungs at each time point and the fold  
842 changes in fluorescence were calculated. **E) Gross pathology score:** Pathology lesions,  
843 consolidation, congestion, and atelectasis, of excised lungs were measured using NIH  
844 ImageJ and represented as percentages of total lung surface area affected. ns, not  
845 significant. \*,  $P < 0.05$ ; \*\*\*,  $P < 0.001$ .

846 **Figure 7. Nluc activity and viral titers in tissue homogenates from infected K18**  
847 **hACE2 transgenic mice:** The nasal turbinate (left), lungs (middle), and brain (right) of

848 four-to-six-weeks-old female K18 hACE2 transgenic mice (n=4) mock-infected or infected  
849 intranasally with  $10^5$  PFU/mouse of rSARS-CoV-2 WT, rSARS-CoV-2/mCherry, rSARS-  
850 CoV-2/Nluc, rSARS-CoV-2/mCherry + rSARS-CoV-2/Nluc, or the bireporter rSARS-CoV-  
851 2/mCherry-Nluc were collected after imaging on an Ami HT IVIS on 2 and 4 DPI. After  
852 homogenization, Nluc activity (**A**) and viral titers (**B**) in tissue homogenates were  
853 determined on a microplate reader or by plaque assay, respectively. The results are the  
854 mean values and SD. LOD, limit of detection. ns, not significant. nd, not detected. \*\*,  $P <$   
855 0.01; \*\*\*,  $P < 0.001$ .

856 **Figure 8. *In vivo* bioluminescence and *ex vivo* fluorescence in golden Syrian**  
857 **hamsters infected with rSARS-CoV-2/mCherry-Nluc. A) *In vivo* Nluc expression:**  
858 Nluc activity in four-to-six-weeks-old female golden Syrian hamsters (n=4) mock-infected  
859 or infected with  $10^5$  PFU/hamster of rSARS-CoV-2/mCherry-Nluc were determined on 2,  
860 4 and 6 DPI using the Ami HT IVIS. Contact animals were exposed to infected animals 1  
861 DPI. A representative image of a hamster per time points and experimental condition is  
862 shown. **B) Quantification of Nluc signal:** Means and SD of the radiance (number of  
863 photons per second per square centimeter per steradian [p/second/cm<sup>2</sup>/sr]) and  
864 bioluminescence (total flux [ $\log_{10}$  photons per second (p/s)]) were quantified from whole  
865 hamsters after IVIS imaging. **C) *Ex vivo* mCherry and Nluc expression:** Excised lungs  
866 from mock-infected or infected golden Syrian hamsters from panel A were monitored for  
867 mCherry fluorescence (FL, top), Nluc signal (Nluc, middle), and bright field (BF, bottom)  
868 at 2, 4, and 6 DPI. Representative lung images from the same hamster used in panel A  
869 are shown. **D) Quantification of mCherry expression:** the mean values of mCherry  
870 signal around the regions of interest were normalized to the autofluorescence of mock-

871 infected lungs at each time point and the fold changes in fluorescence were calculated.

872 **E) Gross pathology score:** Pathological lesions, consolidation, congestion, and  
873 atelectasis, of excised lungs were measured using NIH ImageJ and represented as  
874 percentages of total lung surface area affected. ns, not significant. \*,  $P < 0.05$ ; \*\*\*,  $P <$   
875 0.001.

876 **Figure 9. Nluc activity and viral titers in golden Syrian hamster tissue homogenates**  
877 **infected with rSARS-CoV-2/mCherry-Nluc:** The nasal turbinate (left) and lungs (right)  
878 of four-to-six-weeks-old female golden Syrian hamsters (n=4) mock-infected or infected  
879 intranasally with  $10^5$  PFU/hamster of rSARS-CoV-2/mCherry-Nluc were collected after  
880 imaging on an Ami HT IVIS at 2 and 4 DPI. In addition, after 24 hpi, contact golden Syrian  
881 hamsters (n=4, contact) were added to the cages of infected animals. After  
882 homogenization, Nluc activity (**A**) and viral titers (**B**) in tissue homogenates were  
883 determined on a microplate reader or by plaque assay, respectively. Results are the  
884 means and SD. LOD, limit of detection. ns, not significant. nd, not detected. \*\*\*,  $P < 0.001$ .

885

886

887

888

889

890

891

892

893

894 **REFERENCES**

- 895 1. Zhu N, Zhang D, Wang W, Li X, Yang B, Song J, Zhao X, Huang B, Shi W, Lu R,  
896 Niu P, Zhan F, Ma X, Wang D, Xu W, Wu G, Gao GF, Tan W, China Novel  
897 Coronavirus I, Research T. 2020. A Novel Coronavirus from Patients with  
898 Pneumonia in China, 2019. *N Engl J Med* 382:727-733.
- 899 2. Dong E, Du H, Gardner L. 2020. An interactive web-based dashboard to track  
900 COVID-19 in real time. *Lancet Infect Dis* 20:533-534.
- 901 3. Mizumoto K, Kagaya K, Zarebski A, Chowell G. 2020. Estimating the  
902 asymptomatic proportion of coronavirus disease 2019 (COVID-19) cases on board  
903 the Diamond Princess cruise ship, Yokohama, Japan, 2020. *Euro Surveill* 25.
- 904 4. Gudbjartsson DF, Helgason A, Jonsson H, Magnusson OT, Melsted P, Norddahl  
905 GL, Saemundsdottir J, Sigurdsson A, Sulem P, Agustsdottir AB, Eiriksdottir B,  
906 Fridriksdottir R, Gardarsdottir EE, Georgsson G, Gretarsdottir OS, Gudmundsson  
907 KR, Gunnarsdottir TR, Gylfason A, Holm H, Jensson BO, Jonasdottir A, Jonsson  
908 F, Josefsdottir KS, Kristjansson T, Magnusdottir DN, le Roux L, Sigmundsdottir G,  
909 Sveinbjornsson G, Sveinsdottir KE, Sveinsdottir M, Thorarensen EA,  
910 Thorbjornsson B, Löve A, Masson G, Jonsdottir I, Möller AD, Gudnason T,  
911 Kristinsson KG, Thorsteinsdottir U, Stefansson K. 2020. Spread of SARS-CoV-2  
912 in the Icelandic Population. *N Engl J Med* 382:2302-2315.
- 913 5. Zaki AM, van Boheemen S, Bestebroer TM, Osterhaus AD, Fouchier RA. 2012.  
914 Isolation of a novel coronavirus from a man with pneumonia in Saudi Arabia. *N*  
915 *Engl J Med* 367:1814-20.



- 916 6. de Wit E, van Doremalen N, Falzarano D, Munster VJ. 2016. SARS and MERS:  
917 recent insights into emerging coronaviruses. *Nat Rev Microbiol* 14:523-34.
- 918 7. Chen B, Tian EK, He B, Tian L, Han R, Wang S, Xiang Q, Zhang S, El Arnaout T,  
919 Cheng W. 2020. Overview of lethal human coronaviruses. *Signal Transduct Target*  
920 *Ther* 5:89.
- 921 8. Kahn JS. 2006. The widening scope of coronaviruses. *Curr Opin Pediatr* 18:42-7.
- 922 9. Peacock TP, Goldhill DH, Zhou J, Baillon L, Frise R, Swann OC, Kugathasan R,  
923 Penn R, Brown JC, Sanchez-David RY, Braga L, Williamson MK, Hassard JA,  
924 Staller E, Hanley B, Osborn M, Giacca M, Davidson AD, Matthews DA, Barclay  
925 WS. 2021. The furin cleavage site in the SARS-CoV-2 spike protein is required for  
926 transmission in ferrets. *Nat Microbiol* 6:899-909.
- 927 10. Johnson BA, Xie X, Bailey AL, Kalveram B, Lokugamage KG, Muruato A, Zou J,  
928 Zhang X, Juelich T, Smith JK, Zhang L, Bopp N, Schindewolf C, Vu M,  
929 Vanderheiden A, Winkler ES, Swetnam D, Plante JA, Aguilar P, Plante KS, Popov  
930 V, Lee B, Weaver SC, Suthar MS, Routh AL, Ren P, Ku Z, An Z, Debbink K,  
931 Diamond MS, Shi PY, Freiberg AN, Menachery VD. 2021. Loss of furin cleavage  
932 site attenuates SARS-CoV-2 pathogenesis. *Nature* 591:293-299.
- 933 11. Wang M, Cao R, Zhang L, Yang X, Liu J, Xu M, Shi Z, Hu Z, Zhong W, Xiao G.  
934 2020. Remdesivir and chloroquine effectively inhibit the recently emerged novel  
935 coronavirus (2019-nCoV) in vitro. *Cell Res* 30:269-271.
- 936 12. Beigel JH, Tomashek KM, Dodd LE, Mehta AK, Zingman BS, Kalil AC, Hohmann  
937 E, Chu HY, Luetkemeyer A, Kline S, Lopez de Castilla D, Finberg RW, Dierberg  
938 K, Tapon V, Hsieh L, Patterson TF, Paredes R, Sweeney DA, Short WR,

- 939 Touloumi G, Lye DC, Ohmagari N, Oh MD, Ruiz-Palacios GM, Benfield T,  
940 Fatkenheuer G, Kortepeter MG, Atmar RL, Creech CB, Lundgren J, Babiker AG,  
941 Pett S, Neaton JD, Burgess TH, Bonnett T, Green M, Makowski M, Osinusi A,  
942 Nayak S, Lane HC, Members A-SG. 2020. Remdesivir for the Treatment of Covid-  
943 19 - Final Report. *N Engl J Med* 383:1813-1826.
- 944 13. Jones BE, Brown-Augsburger PL, Corbett KS, Westendorf K, Davies J, Cujec TP,  
945 Wiethoff CM, Blackbourne JL, Heinz BA, Foster D, Higgs RE, Balasubramaniam  
946 D, Wang L, Zhang Y, Yang ES, Bidshahri R, Kraft L, Hwang Y, Žentelis S, Jepson  
947 KR, Goya R, Smith MA, Collins DW, Hinshaw SJ, Tycho SA, Pellacani D, Xiang P,  
948 Muthuraman K, Sobhanifar S, Piper MH, Triana FJ, Hendle J, Pustilnik A, Adams  
949 AC, Berens SJ, Baric RS, Martinez DR, Cross RW, Geisbert TW, Borisevich V,  
950 Abiona O, Belli HM, de Vries M, Mohamed A, Dittmann M, Samanovic MI, Mulligan  
951 MJ, Goldsmith JA, Hsieh CL, Johnson NV, et al. 2021. The neutralizing antibody,  
952 LY-CoV555, protects against SARS-CoV-2 infection in nonhuman primates. *Sci*  
953 *Transl Med* 13.
- 954 14. Madhi SA, Baillie V, Cutland CL, Voysey M, Koen AL, Fairlie L, Padayachee SD,  
955 Dheda K, Barnabas SL, Bhorat QE, Briner C, Kwatra G, Ahmed K, Aley P, Bhikha  
956 S, Bhiman JN, Bhorat AE, du Plessis J, Esmail A, Groenewald M, Horne E, Hwa  
957 SH, Jose A, Lambe T, Laubscher M, Malahleha M, Masenya M, Masilela M,  
958 McKenzie S, Molapo K, Moultrie A, Oelofse S, Patel F, Pillay S, Rhead S, Rodel  
959 H, Rossouw L, Taoushanis C, Tegally H, Thombrayil A, van Eck S, Wibmer CK,  
960 Durham NM, Kelly EJ, Villafana TL, Gilbert S, Pollard AJ, de Oliveira T, Moore PL,

- 961 Sigal A, et al. 2021. Efficacy of the ChAdOx1 nCoV-19 Covid-19 Vaccine against  
962 the B.1.351 Variant. *N Engl J Med* 384:1885-1898.
- 963 15. Irfan N, Chagla Z. 2021. In South Africa, a 2-dose Oxford/AZ vaccine did not  
964 prevent mild to moderate COVID-19 (cases mainly B.1.351 variant). *Ann Intern*  
965 *Med* 174:JC50.
- 966 16. Tegally H, Wilkinson E, Giovanetti M, Iranzadeh A, Fonseca V, Giandhari J,  
967 Doolabh D, Pillay S, San EJ, Msomi N, Mlisana K, von Gottberg A, Walaza S,  
968 Allam M, Ismail A, Mohale T, Glass AJ, Engelbrecht S, Van Zyl G, Preiser W,  
969 Petruccione F, Sigal A, Hardie D, Marais G, Hsiao M, Korsman S, Davies M-A,  
970 Tyers L, Mudau I, York D, Maslo C, Goedhals D, Abrahams S, Laguda-Akingba O,  
971 Alisoltani-Dehkordi A, Godzik A, Wibmer CK, Sewell BT, Lourenço J, Alcantara  
972 LCJ, Pond SLK, Weaver S, Martin D, Lessells RJ, Bhiman JN, Williamson C, de  
973 Oliveira T. 2020. Emergence and rapid spread of a new severe acute respiratory  
974 syndrome-related coronavirus 2 (SARS-CoV-2) lineage with multiple spike  
975 mutations in South Africa. *medRxiv*  
976 doi:10.1101/2020.12.21.20248640:2020.12.21.20248640.
- 977 17. Andrews N, Stowe J, Kirsebom F, Toffa S, Rickeard T, Gallagher E, Gower C, Kall  
978 M, Groves N, O'Connell AM, Simons D, Blomquist PB, Zaidi A, Nash S, Iwani Binti  
979 Abdul Aziz N, Thelwall S, Dabrera G, Myers R, Amirthalingam G, Gharbia S,  
980 Barrett JC, Elson R, Ladhani SN, Ferguson N, Zambon M, Campbell CNJ, Brown  
981 K, Hopkins S, Chand M, Ramsay M, Lopez Bernal J. 2022. Covid-19 Vaccine  
982 Effectiveness against the Omicron (B.1.1.529) Variant. *N Engl J Med*  
983 doi:10.1056/NEJMoa2119451.

- 984 18. Chenchula S, Karunakaran P, Sharma S, Chavan M. 2022. Current evidence on  
985 efficacy of COVID-19 booster dose vaccination against the Omicron variant: A  
986 systematic review. *J Med Virol* doi:10.1002/jmv.27697.
- 987 19. Ye C, Chiem K, Park JG, Oladunni F, Platt RN, Anderson T, Almazan F, de la  
988 Torre JC, Martinez-Sobrido L. 2020. Rescue of SARS-CoV-2 from a single  
989 bacterial artificial chromosome. *bioRxiv* doi:10.1101/2020.07.22.216358.
- 990 20. Avila-Perez G, Nogales A, Park JG, Vasquez DM, Dean DA, Barravecchia M,  
991 Perez DR, Almazan F, Martinez-Sobrido L. 2020. In vivo rescue of recombinant  
992 Zika virus from an infectious cDNA clone and its implications in vaccine  
993 development. *Sci Rep* 10:512.
- 994 21. Avila-Perez G, Park JG, Nogales A, Almazan F, Martinez-Sobrido L. 2019. Rescue  
995 of Recombinant Zika Virus from a Bacterial Artificial Chromosome cDNA Clone. *J*  
996 *Vis Exp* doi:10.3791/59537.
- 997 22. Xie X, Muruato A, Lokugamage KG, Narayanan K, Zhang X, Zou J, Liu J,  
998 Schindewolf C, Bopp NE, Aguilar PV, Plante KS, Weaver SC, Makino S, LeDuc  
999 JW, Menachery VD, Shi PY. 2020. An Infectious cDNA Clone of SARS-CoV-2. *Cell*  
1000 *Host Microbe* 27:841-848 e3.
- 1001 23. Cai Y, Iwasaki M, Beitzel BF, Yú S, Postnikova EN, Cubitt B, DeWald LE,  
1002 Radoshitzky SR, Bollinger L, Jahrling PB, Palacios GF, de la Torre JC, Kuhn JH.  
1003 2018. Recombinant Lassa Virus Expressing Green Fluorescent Protein as a Tool  
1004 for High-Throughput Drug Screens and Neutralizing Antibody Assays. *Viruses* 10.
- 1005 24. Nogales A, Perez DR, Santos J, Finch C, Martinez-Sobrido L. 2017. Reverse  
1006 Genetics of Influenza B Viruses. *Methods Mol Biol* 1602:205-238.

- 1007 25. Breen M, Nogales A, Baker SF, Martínez-Sobrido L. 2016. Replication-Competent  
1008 Influenza A Viruses Expressing Reporter Genes. *Viruses* 8.
- 1009 26. Engelhardt OG. 2013. Many ways to make an influenza virus--review of influenza  
1010 virus reverse genetics methods. *Influenza Other Respir Viruses* 7:249-56.
- 1011 27. Ujike M, Etoh Y, Urushiyama N, Taguchi F, Asanuma H, Enjuanes L, Kamitani W.  
1012 2022. Reverse Genetics with a Full-Length Infectious cDNA Clone of Bovine  
1013 Torovirus. *J Virol* 96:e0156121.
- 1014 28. Amarilla AA, Sng JDJ, Parry R, Deerain JM, Potter JR, Setoh YX, Rawle DJ, Le  
1015 TT, Modhiran N, Wang X, Peng NYG, Torres FJ, Pyke A, Harrison JJ, Freney ME,  
1016 Liang B, McMillan CLD, Cheung STM, Guevara DJDC, Hardy JM, Bettington M,  
1017 Muller DA, Coulibaly F, Moore F, Hall RA, Young PR, Mackenzie JM, Hobson-  
1018 Peters J, Suhrbier A, Watterson D, Khromykh AA. 2021. A versatile reverse  
1019 genetics platform for SARS-CoV-2 and other positive-strand RNA viruses. *Nat*  
1020 *Commun* 12:3431.
- 1021 29. Feng M, Li L, Cheng R, Yuan Y, Dong Y, Chen M, Guo R, Yao M, Xu Y, Zhou Y,  
1022 Wu J, Ding XS, Zhou X, Tao X. 2021. Development of a Mini-Replicon-Based  
1023 Reverse-Genetics System for Rice Stripe Tenuivirus. *J Virol* 95:e0058921.
- 1024 30. Smith A, Rodriguez L, Ghouayel ME, Nogales A, Chamberlain JM, Sortino K, Reilly  
1025 E, Feng C, Topham DJ, Martinez-Sobrido L, Dewhurst S. 2019. A live-attenuated  
1026 influenza vaccine (LAIV) elicits enhanced heterologous protection when the  
1027 internal genes of the vaccine are matched to the challenge virus. *J Virol*  
1028 doi:JV1.01065-19 [pii]  
1029 10.1128/JVI.01065-19.

- 1030 31. Rodriguez L, Blanco-Lobo P, Reilly EC, Maehigashi T, Nogales A, Smith A,  
1031 Topham DJ, Dewhurst S, Kim B, Martinez-Sobrido L. 2019. Comparative Study of  
1032 the Temperature Sensitive, Cold Adapted and Attenuated Mutations Present in the  
1033 Master Donor Viruses of the Two Commercial Human Live Attenuated Influenza  
1034 Vaccines. *Viruses* 11.
- 1035 32. Blanco-Lobo P, Rodriguez L, Reedy S, Oladunni FS, Nogales A, Murcia PR,  
1036 Chambers TM, Martinez-Sobrido L. 2019. A Bivalent Live-Attenuated Vaccine for  
1037 the Prevention of Equine Influenza Virus. *Viruses* 11.
- 1038 33. Rodriguez L, Reedy S, Nogales A, Murcia PR, Chambers TM, Martinez-Sobrido L.  
1039 2018. Development of a novel equine influenza virus live-attenuated vaccine.  
1040 *Virology* 516:76-85.
- 1041 34. Jack BR, Boutz DR, Paff ML, Smith BL, Bull JJ, Wilke CO. 2017. Reduced Protein  
1042 Expression in a Virus Attenuated by Codon Deoptimization. *G3 (Bethesda)* 7:2957-  
1043 2968.
- 1044 35. Fan RL, Valkenburg SA, Wong CK, Li OT, Nicholls JM, Rabadan R, Peiris JS,  
1045 Poon LL. 2015. Generation of Live Attenuated Influenza Virus by Using Codon  
1046 Usage Bias. *J Virol* 89:10762-73.
- 1047 36. Chiem K, Lorenzo M, Rangel-Moreno J, De La Luz Garcia-Hernandez M, Park J-  
1048 G, Nogales A, Blasco R, Martínez-Sobrido L. 2021. Bi-reporter vaccinia virus for  
1049 tracking viral infections *in vitro* and *in vivo*. bioRxiv  
1050 doi:10.1101/2021.08.24.457594:2021.08.24.457594.

- 1051 37. Nogales A, Ávila-Pérez G, Rangel-Moreno J, Chiem K, DeDiego ML, Martínez-  
1052 Sobrido L. 2019. A novel fluorescent and bioluminescent Bi-Reporter influenza A  
1053 virus (BIRFLU) to evaluate viral infections. *J Virol* doi:10.1128/JVI.00032-19.
- 1054 38. DiPiazza A, Nogales A, Poulton N, Wilson PC, Martinez-Sobrido L, Sant AJ. 2017.  
1055 Pandemic 2009 H1N1 Influenza Venus reporter virus reveals broad diversity of  
1056 MHC class II-positive antigen-bearing cells following infection in vivo. *Scientific*  
1057 *Reports* 7:10857.
- 1058 39. Zou G, Xu HY, Qing M, Wang QY, Shi PY. 2011. Development and  
1059 characterization of a stable luciferase dengue virus for high-throughput screening.  
1060 *Antiviral Res* 91:11-9.
- 1061 40. Ozawa M, Victor ST, Taft AS, Yamada S, Li C, Hatta M, Das SC, Takashita E,  
1062 Kakugawa S, Maher EA, Neumann G, Kawaoka Y. 2011. Replication-incompetent  
1063 influenza A viruses that stably express a foreign gene. *J Gen Virol* 92:2879-88.
- 1064 41. Rimmelzwaan GF, Verburgh RJ, Nieuwkoop NJ, Bestebroer TM, Fouchier RA,  
1065 Osterhaus AD. 2011. Use of GFP-expressing influenza viruses for the detection of  
1066 influenza virus A/H5N1 neutralizing antibodies. *Vaccine* 29:3424-30.
- 1067 42. Nogales A, Baker SF, Martínez-Sobrido L. 2015. Replication-competent influenza  
1068 A viruses expressing a red fluorescent protein. *Virology* 476:206-16.
- 1069 43. Ye C, Chiem K, Park J-G, Silvas JA, Vasquez DM, Torrelles JB, Kobie JJ, Walter  
1070 MR, de la Torre JC, Martinez-Sobrido L. 2021. Visualization of SARS-CoV-2  
1071 infection dynamic. bioRxiv doi:10.1101/2021.06.03.446942:2021.06.03.446942.
- 1072 44. Chiem K, Morales Vasquez D, Park JG, Platt RN, Anderson T, Walter MR, Kobie  
1073 JJ, Ye C, Martinez-Sobrido L. 2021. Generation and Characterization of

- 1074 recombinant SARS-CoV-2 expressing reporter genes. *J Virol*  
1075 doi:10.1128/JVI.02209-20.
- 1076 45. Chiem K, Morales Vasquez D, Silvas JA, Park JG, Piepenbrink MS, Sourimant J,  
1077 Lin MJ, Greninger AL, Plemper RK, Torrelles JB, Walter MR, de la Torre JC, Kobie  
1078 JK, Ye C, Martinez-Sobrido L. 2021. A Bifluorescent-Based Assay for the  
1079 Identification of Neutralizing Antibodies against SARS-CoV-2 Variants of Concern.  
1080 *J Virol* 95:e0112621.
- 1081 46. Xie X, Muruato AE, Zhang X, Lokugamage KG, Fontes-Garfias CR, Zou J, Liu J,  
1082 Ren P, Balakrishnan M, Cihlar T, Tseng C-TK, Makino S, Menachery VD, Bilello  
1083 JP, Shi P-Y. 2020. A nanoluciferase SARS-CoV-2 for rapid neutralization testing  
1084 and screening of anti-infective drugs for COVID-19. *bioRxiv*  
1085 doi:10.1101/2020.06.22.165712:2020.06.22.165712.
- 1086 47. Xie X, Muruato A, Lokugamage KG, Narayanan K, Zhang X, Zou J, Liu J,  
1087 Schindewolf C, Bopp NE, Aguilar PV, Plante KS, Weaver SC, Makino S, LeDuc  
1088 JW, Menachery VD, Shi PY. 2020. An Infectious cDNA Clone of SARS-CoV-2. *Cell*  
1089 *Host Microbe* 27:841-848.e3.
- 1090 48. Hall MP, Unch J, Binkowski BF, Valley MP, Butler BL, Wood MG, Otto P,  
1091 Zimmerman K, Vidugiris G, Machleidt T, Robers MB, Benink HA, Eggers CT, Slater  
1092 MR, Meisenheimer PL, Klaubert DH, Fan F, Encell LP, Wood KV. 2012.  
1093 Engineered luciferase reporter from a deep sea shrimp utilizing a novel  
1094 imidazopyrazinone substrate. *ACS Chem Biol* 7:1848-57.



- 1095 49. Tam JM, Upadhyay R, Pittet MJ, Weissleder R, Mahmood U. 2007. Improved in  
1096 vivo whole-animal detection limits of green fluorescent protein-expressing tumor  
1097 lines by spectral fluorescence imaging. *Mol Imaging* 6:269-76.
- 1098 50. Zhao H, Doyle TC, Coquoz O, Kalish F, Rice BW, Contag CH. 2005. Emission  
1099 spectra of bioluminescent reporters and interaction with mammalian tissue  
1100 determine the sensitivity of detection in vivo. *Journal of Biomedical Optics*  
1101 10:41210.
- 1102 51. Vintersten K, Monetti C, Gertsenstein M, Zhang P, Laszlo L, Biechele S, Nagy A.  
1103 2004. Mouse in red: red fluorescent protein expression in mouse ES cells,  
1104 embryos, and adult animals. *Genesis* 40:241-6.
- 1105 52. Kelkar M, De A. 2012. Bioluminescence based in vivo screening technologies. *Curr*  
1106 *Opin Pharmacol* 12:592-600.
- 1107 53. Shaner NC, Patterson GH, Davidson MW. 2007. Advances in fluorescent protein  
1108 technology. *J Cell Sci* 120:4247-60.
- 1109 54. Welsh DK, Noguchi T. 2012. Cellular bioluminescence imaging. *Cold Spring*  
1110 *Harbor Protocols* 2012.
- 1111 55. Nogales A, Rodriguez-Sanchez I, Monte K, Lenschow DJ, Perez DR, Martinez-  
1112 Sobrido L. 2016. Replication-competent fluorescent-expressing influenza B virus.  
1113 *Virus Res* 213:69-81.
- 1114 56. Chiem K, Rangel-Moreno J, Nogales A, Martinez-Sobrido L. 2019. A Luciferase-  
1115 fluorescent Reporter Influenza Virus for Live Imaging and Quantification of Viral  
1116 Infection. *J Vis Exp* doi:10.3791/59890.

- 1117 57. Chiem K, Ye C, Martinez-Sobrido L. 2020. Generation of Recombinant SARS-  
1118 CoV-2 Using a Bacterial Artificial Chromosome. *Curr Protoc Microbiol* 59:e126.
- 1119 58. Ye C, Chiem K, Park JG, Oladunni F, Platt RN, 2nd, Anderson T, Almazan F, de  
1120 la Torre JC, Martinez-Sobrido L. 2020. Rescue of SARS-CoV-2 from a Single  
1121 Bacterial Artificial Chromosome. *mBio* 11.
- 1122 59. Almazán F, Dediego ML, Galán C, Escors D, Alvarez E, Ortego J, Sola I, Zuñiga  
1123 S, Alonso S, Moreno JL, Nogales A, Capiscol C, Enjuanes L. 2006. Construction  
1124 of a severe acute respiratory syndrome coronavirus infectious cDNA clone and a  
1125 replicon to study coronavirus RNA synthesis. *J Virol* 80:10900-6.
- 1126 60. Bindels DS, Haarbosch L, van Weeren L, Postma M, Wiese KE, Mastop M,  
1127 Aumonier S, Gotthard G, Royant A, Hink MA, Gadella TW. 2017. mScarlet: a bright  
1128 monomeric red fluorescent protein for cellular imaging. *Nat Methods* 14:53-56.
- 1129 61. Luker KE, Pata P, Shemiakina II, Pereverzeva A, Stacer AC, Shcherbo DS,  
1130 Pletnev VZ, Skolnaja M, Lukyanov KA, Luker GD, Pata I, Chudakov DM. 2015.  
1131 Comparative study reveals better far-red fluorescent protein for whole body  
1132 imaging. *Sci Rep* 5:10332.
- 1133 62. Shcherbo D, Merzlyak EM, Chepurnykh TV, Fradkov AF, Ermakova GV, Solovieva  
1134 EA, Lukyanov KA, Bogdanova EA, Zarausky AG, Lukyanov S, Chudakov DM.  
1135 2007. Bright far-red fluorescent protein for whole-body imaging. *Nat Methods*  
1136 4:741-6.
- 1137 63. Stacer AC, Nyati S, Moudgil P, Iyengar R, Luker KE, Rehemtulla A, Luker GD.  
1138 2013. NanoLuc reporter for dual luciferase imaging in living animals. *Mol Imaging*  
1139 12:1-13.

- 1140 64. Sewe SO, Silva G, Sicat P, Seal SE, Visendi P. 2022. Trimming and Validation of  
1141 Illumina Short Reads Using Trimmomatic, Trinity Assembly, and Assessment of  
1142 RNA-Seq Data. *Methods Mol Biol* 2443:211-232.
- 1143 65. Bolger AM, Lohse M, Usadel B. 2014. Trimmomatic: a flexible trimmer for Illumina  
1144 sequence data. *Bioinformatics* 30:2114-20.
- 1145 66. Langmead B, Salzberg SL. 2012. Fast gapped-read alignment with Bowtie 2. *Nat*  
1146 *Methods* 9:357-9.
- 1147 67. Pedersen BS, Quinlan AR. 2018. Mosdepth: quick coverage calculation for  
1148 genomes and exomes. *Bioinformatics* 34:867-868.
- 1149 68. Wilm A, Aw PP, Bertrand D, Yeo GH, Ong SH, Wong CH, Khor CC, Petric R,  
1150 Hibberd ML, Nagarajan N. 2012. LoFreq: a sequence-quality aware, ultra-sensitive  
1151 variant caller for uncovering cell-population heterogeneity from high-throughput  
1152 sequencing datasets. *Nucleic Acids Res* 40:11189-201.
- 1153 69. Park J-G, Oladunni FS, Chiem K, Ye C, Pipenbrink M, Moran T, Walter MR, Kobie  
1154 J, Martinez-Sobrido L. 2021. Rapid in vitro assays for screening neutralizing  
1155 antibodies and antivirals against SARS-CoV-2. *Journal of Virological Methods*  
1156 287:113995.
- 1157 70. Piepenbrink MS, Park JG, Oladunni FS, Deshpande A, Basu M, Sarkar S, Loos A,  
1158 Woo J, Lovalenti P, Sloan D, Ye C, Chiem K, Bates CW, Burch RE, Erdmann NB,  
1159 Goepfert PA, Truong VL, Walter MR, Martinez-Sobrido L, Kobie JJ. 2021.  
1160 Therapeutic activity of an inhaled potent SARS-CoV-2 neutralizing human  
1161 monoclonal antibody in hamsters. *Cell Rep Med* 2:100218.

- 1162 71. Jensen EC. 2013. Quantitative analysis of histological staining and fluorescence  
1163 using ImageJ. *Anat Rec (Hoboken)* 296:378-81.
- 1164 72. Piepenbrink MS, Park J-G, Oladunni FS, Deshpande A, Basu M, Sarkar S, Loos  
1165 A, Woo J, Lovalenti P, Sloan D, Ye C, Chiem K, Erdmann NB, Goepfert PA, Truong  
1166 VL, Walter MR, Martinez-Sobrido L, Kobie JJ. 2020. Therapeutic activity of an  
1167 inhaled potent SARS-CoV-2 neutralizing human monoclonal antibody in hamsters.  
1168 bioRxiv doi:10.1101/2020.10.14.339150:2020.10.14.339150.
- 1169 73. Deshpande A, Harris BD, Martinez-Sobrido L, Kobie JJ, Walter MR. 2021. Epitope  
1170 classification and RBD binding properties of neutralizing antibodies against SARS-  
1171 CoV-2 variants of concern. bioRxiv  
1172 doi:10.1101/2021.04.13.439681:2021.04.13.439681.
- 1173 74. Oladunni FS, Park JG, Pino PA, Gonzalez O, Akhter A, Allué-Guardia A, Olmo-  
1174 Fontánez A, Gautam S, Garcia-Vilanova A, Ye C, Chiem K, Headley C, Dwivedi  
1175 V, Parodi LM, Alfson KJ, Staples HM, Schami A, Garcia JI, Whigham A, Platt RN,  
1176 Gazi M, Martinez J, Chuba C, Earley S, Rodriguez OH, Mdaki SD, Kavelish KN,  
1177 Escalona R, Hallam CRA, Christie C, Patterson JL, Anderson TJC, Carrion R, Dick  
1178 EJ, Hall-Ursone S, Schlesinger LS, Alvarez X, Kaushal D, Giavedoni LD, Turner  
1179 J, Martinez-Sobrido L, Torrelles JB. 2020. Lethality of SARS-CoV-2 infection in  
1180 K18 human angiotensin-converting enzyme 2 transgenic mice. *Nat Commun*  
1181 11:6122.
- 1182

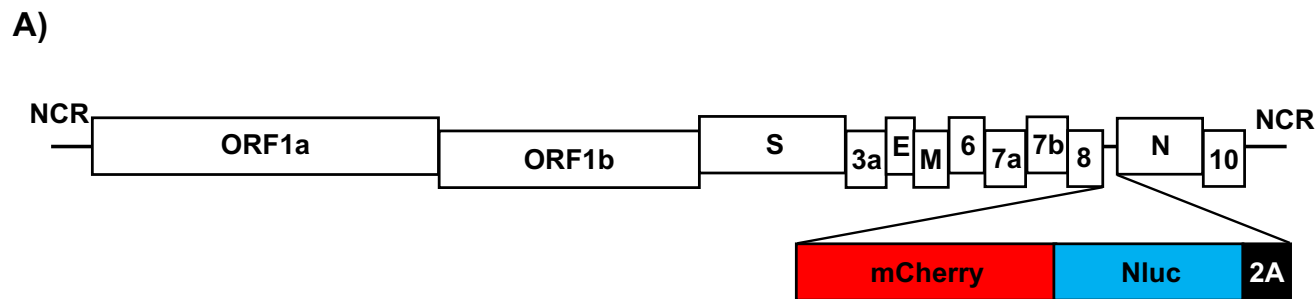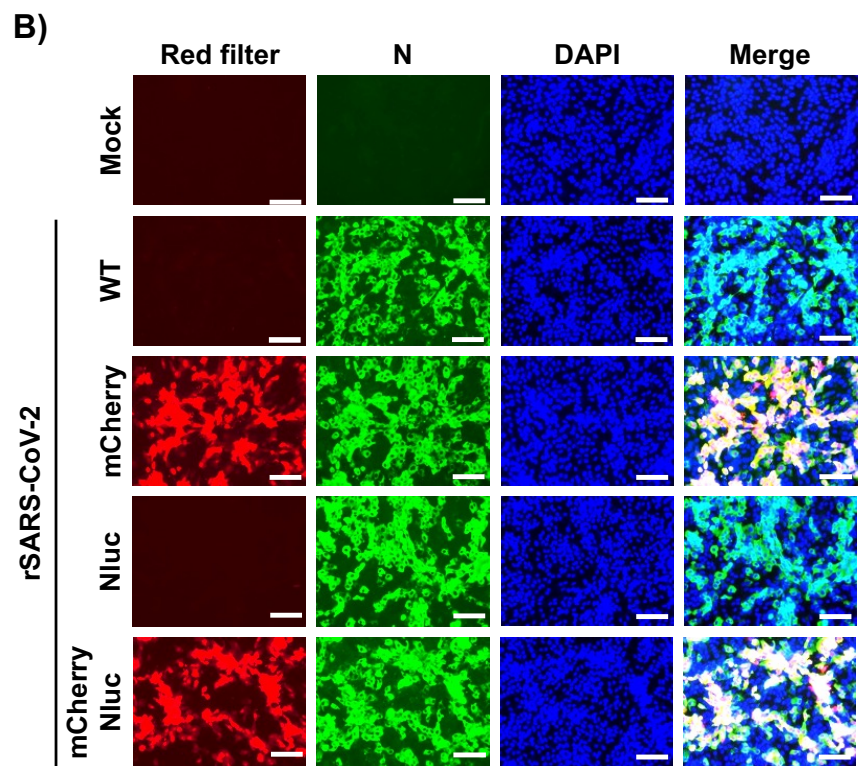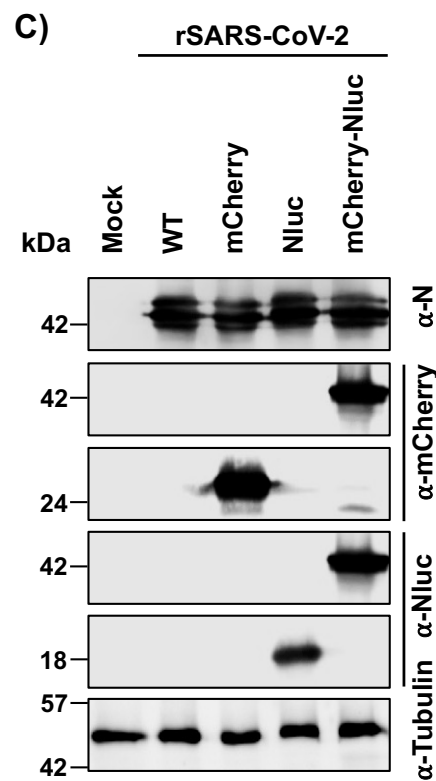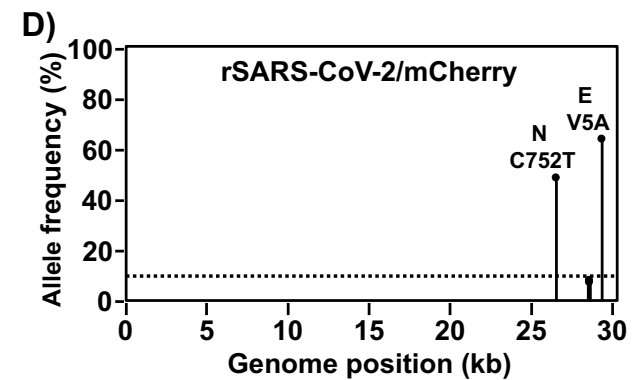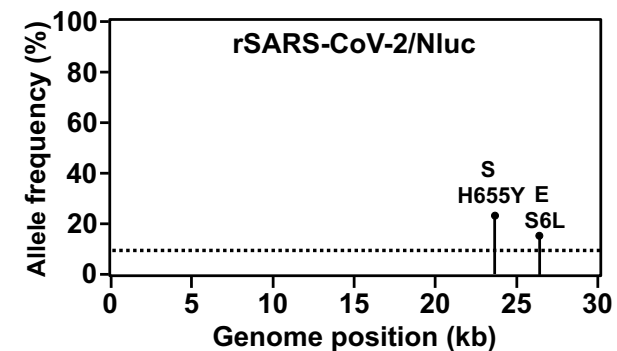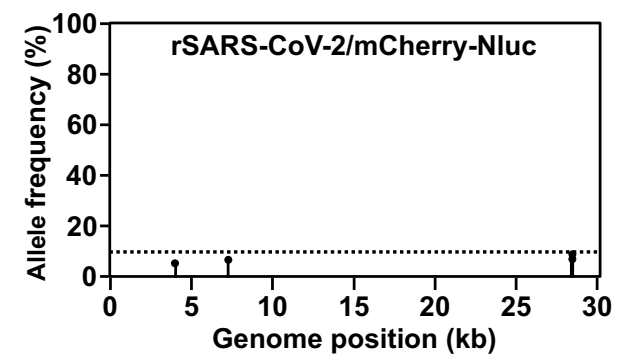

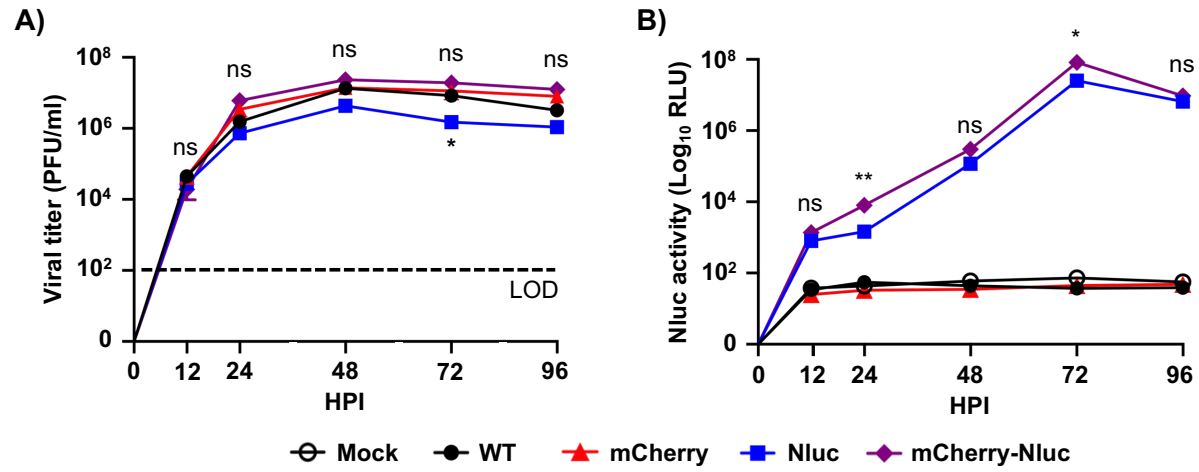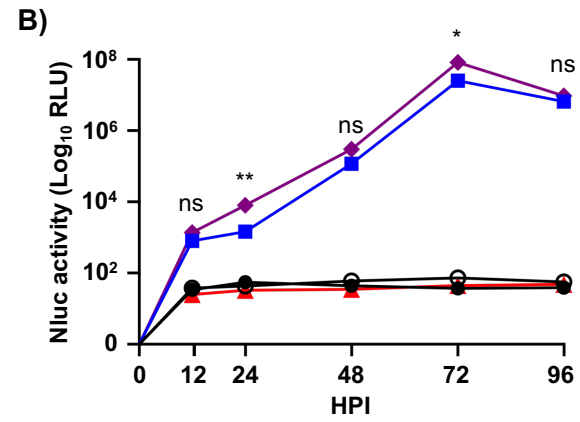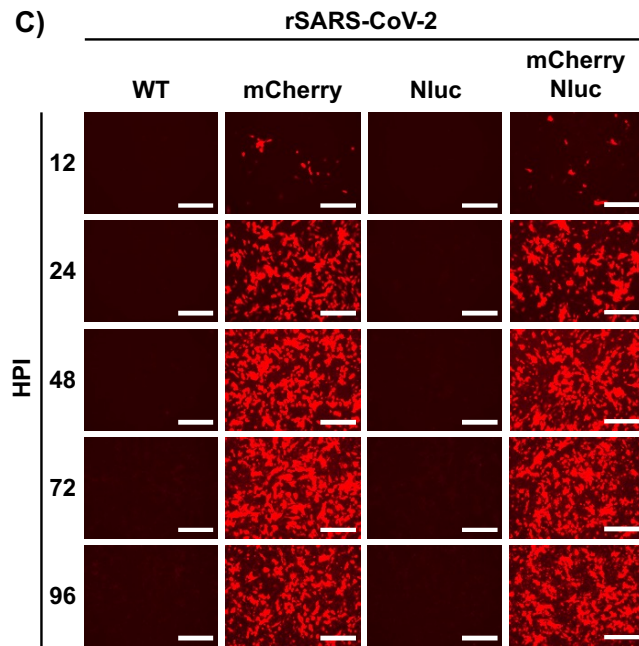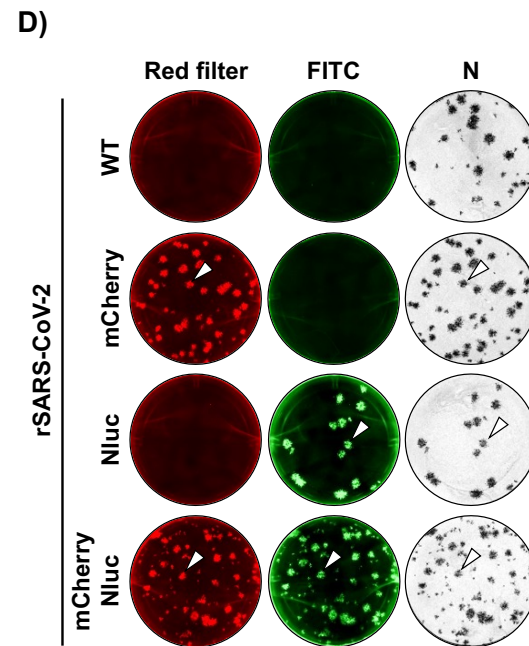

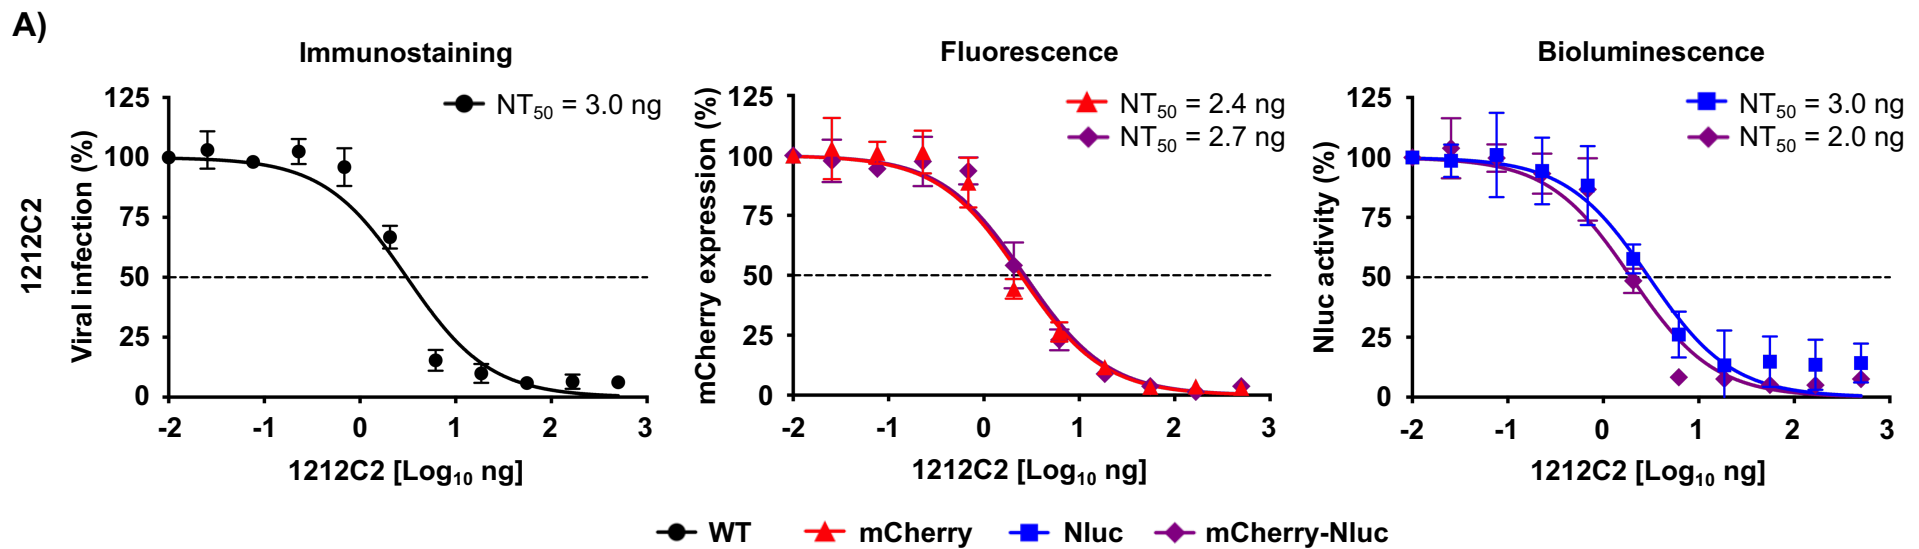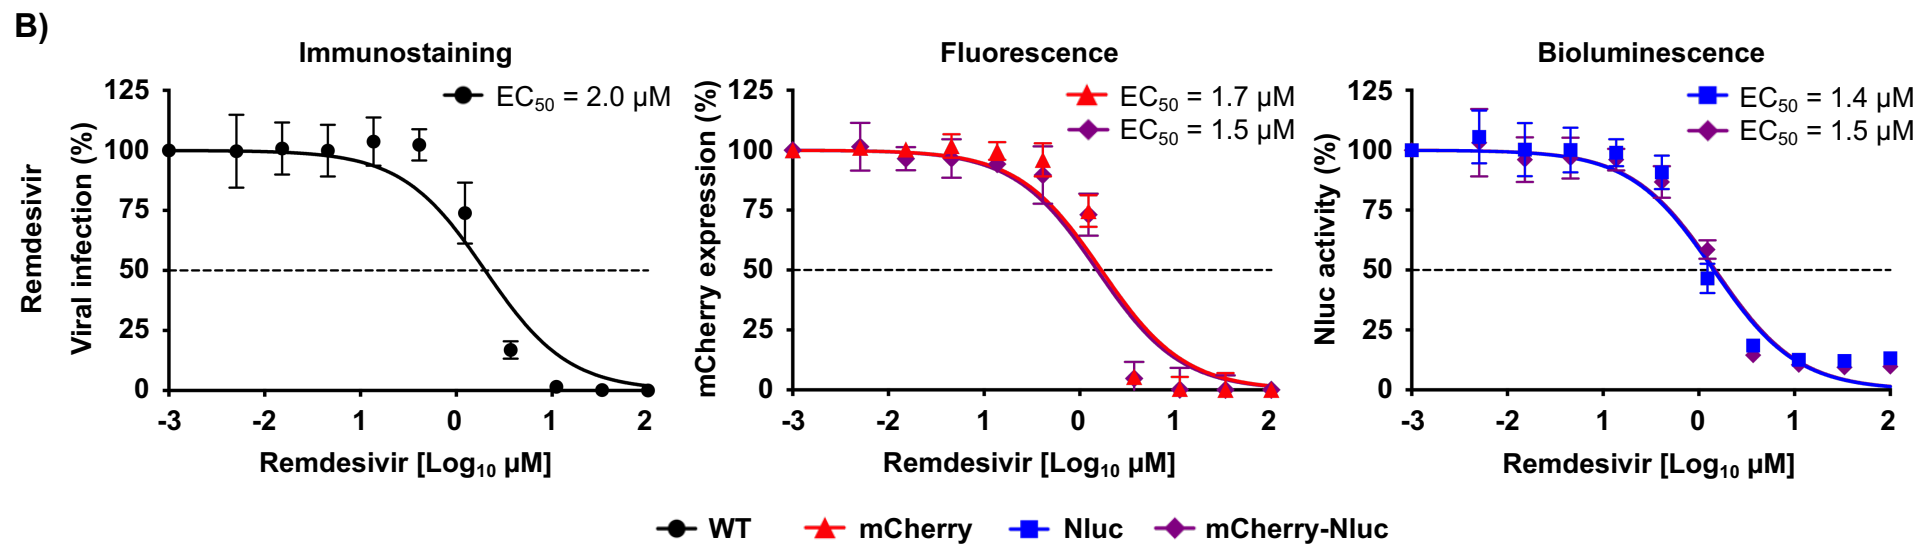

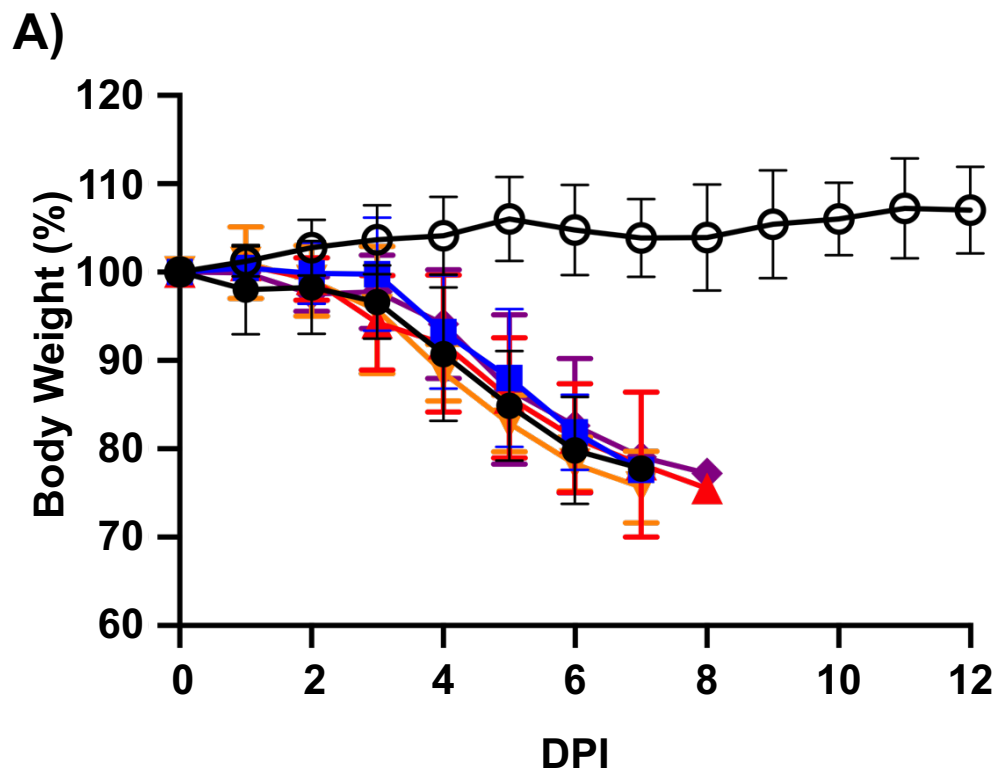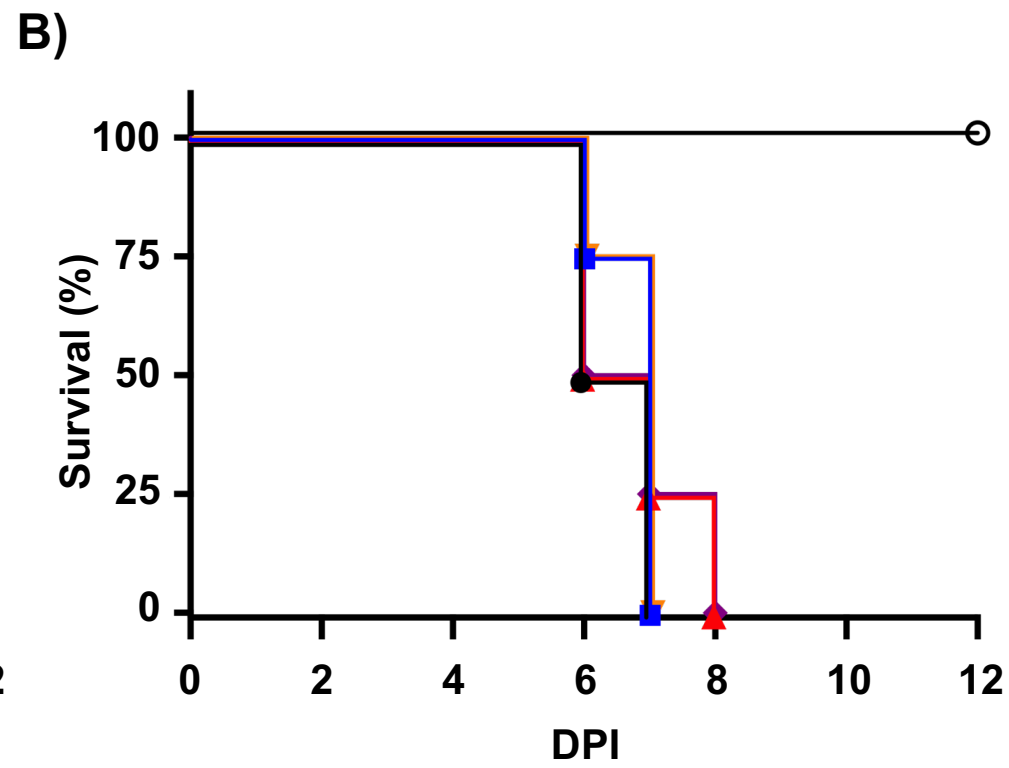

○ Mock   ● WT   ▲ mCherry   ■ Nluc   ▼ mCherry + Nluc   ◆ mCherry-Nluc



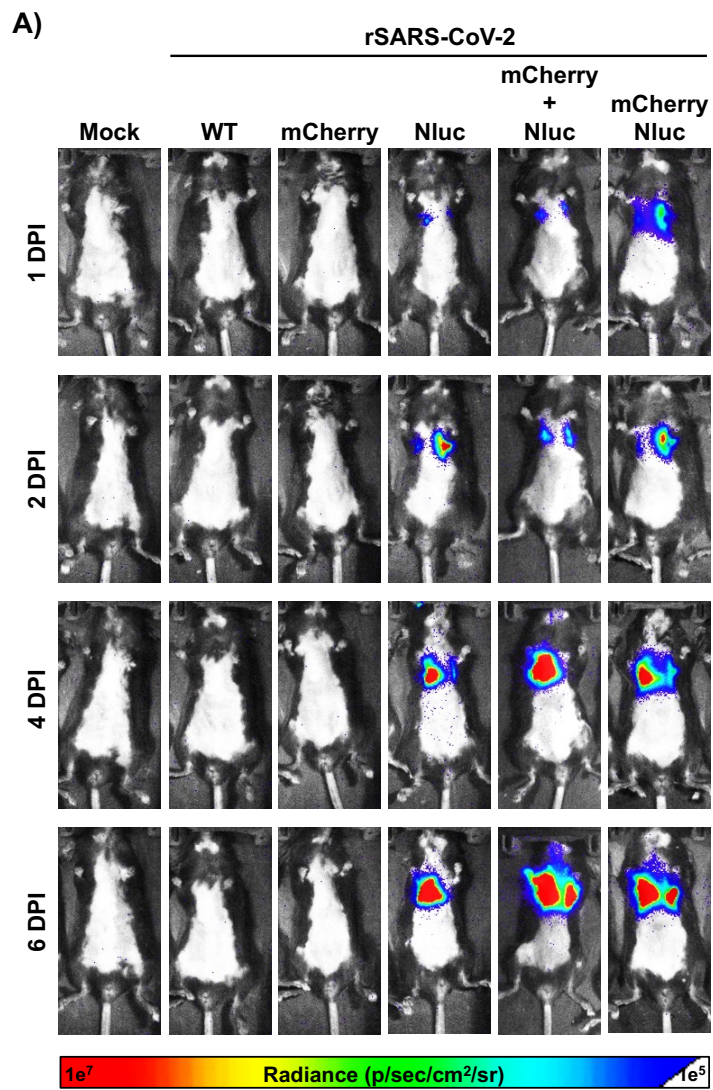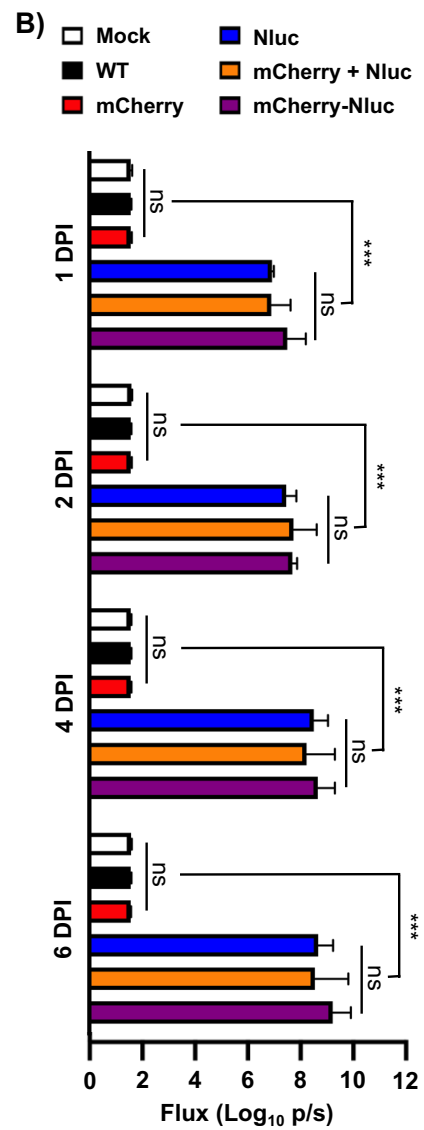

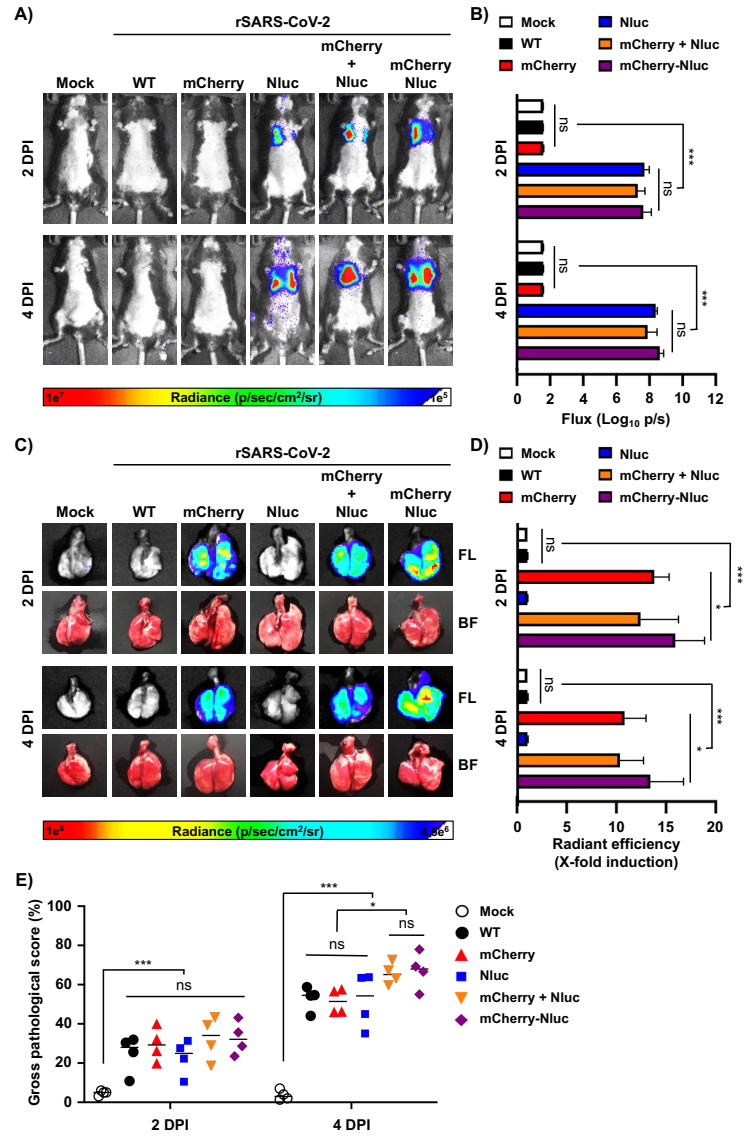

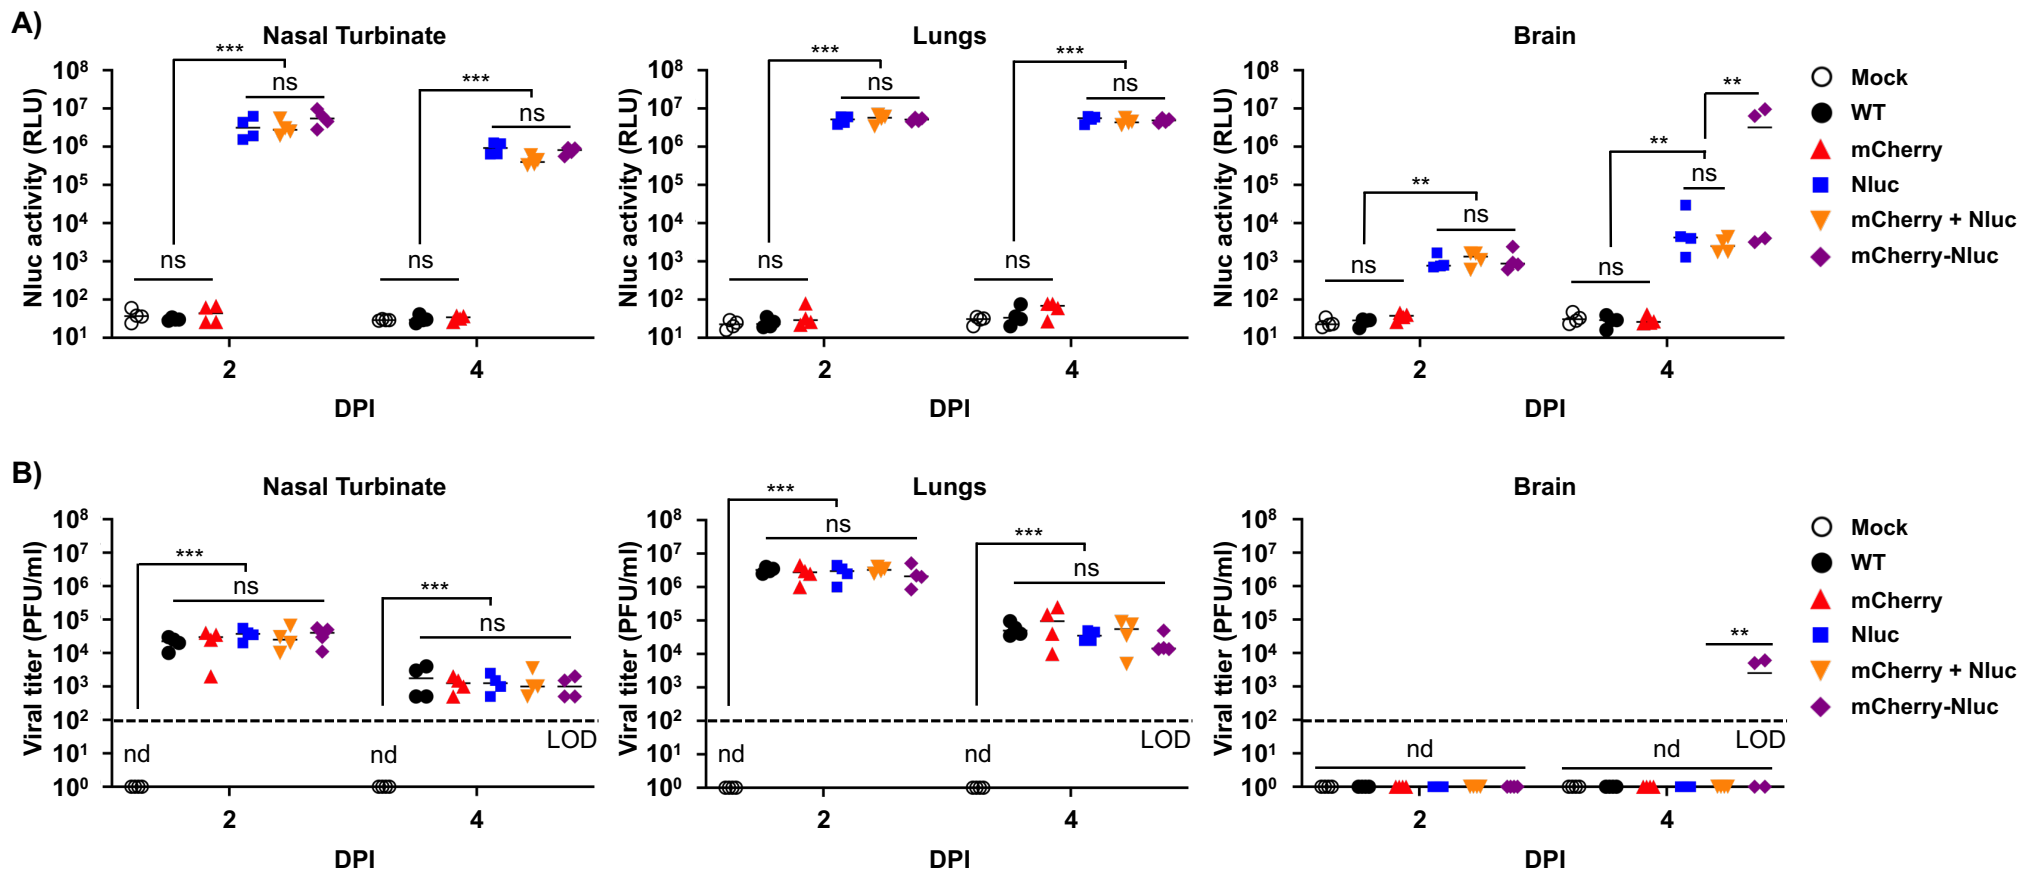

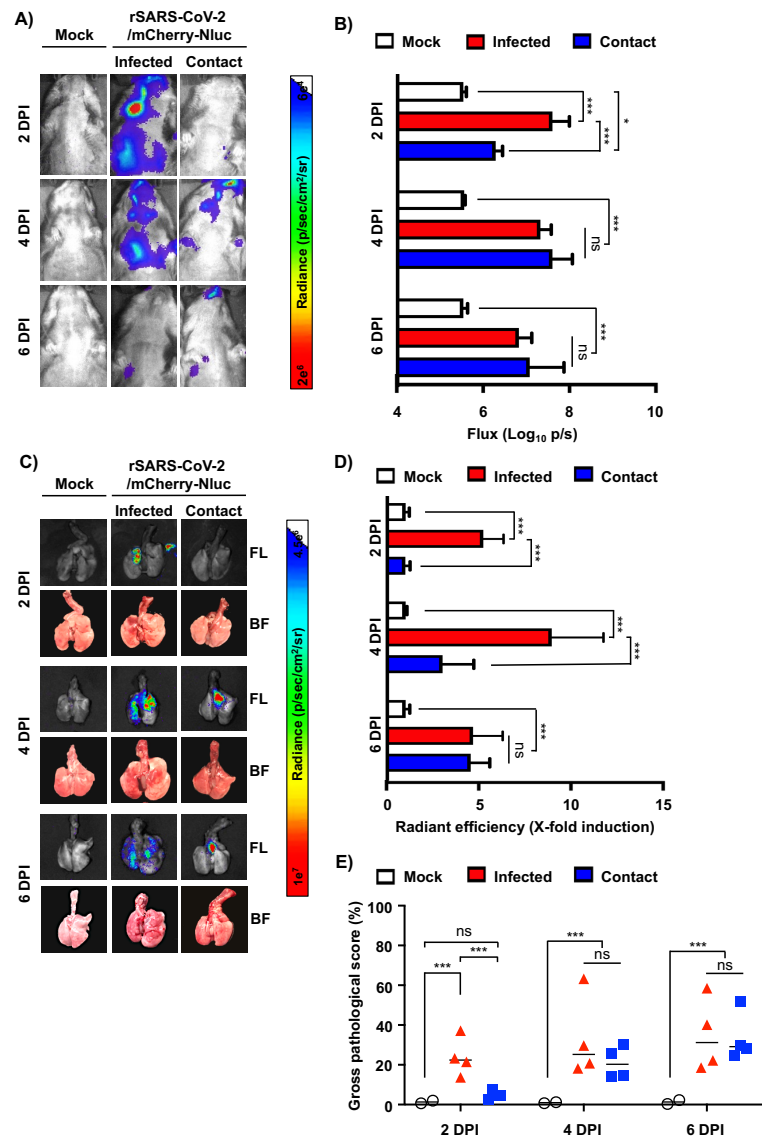

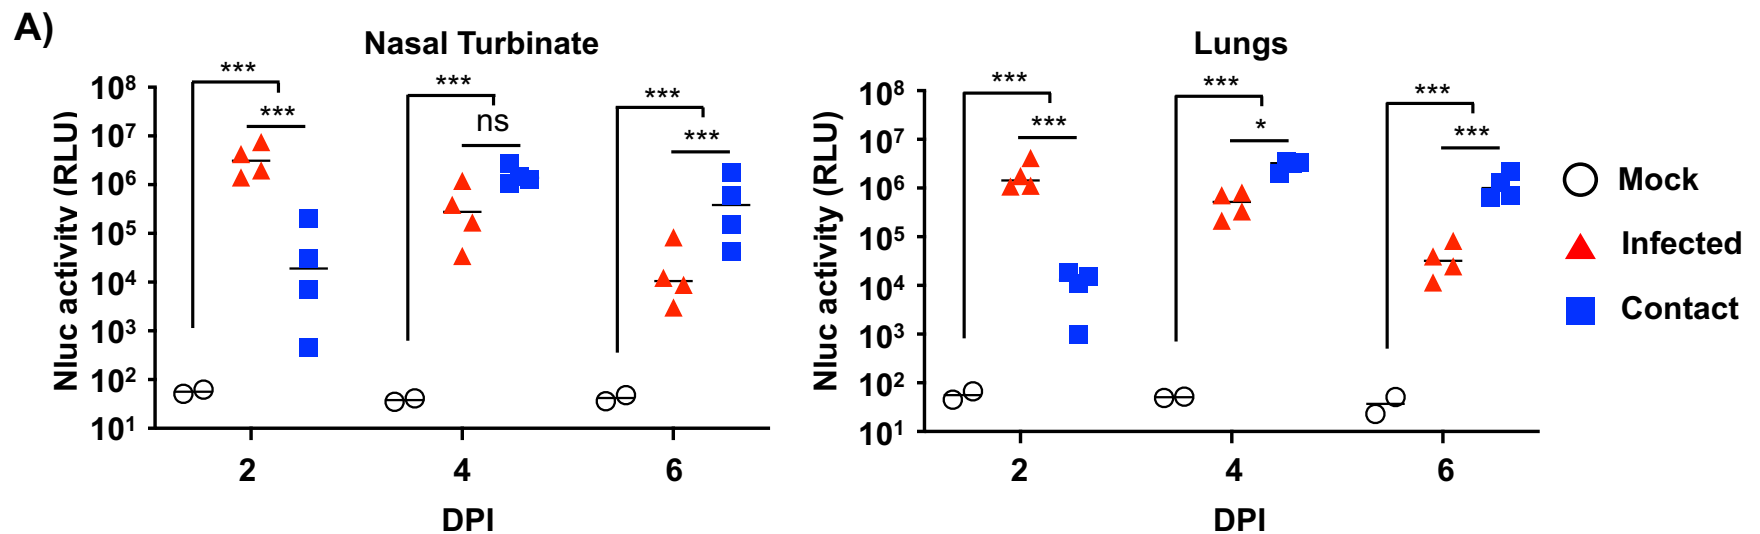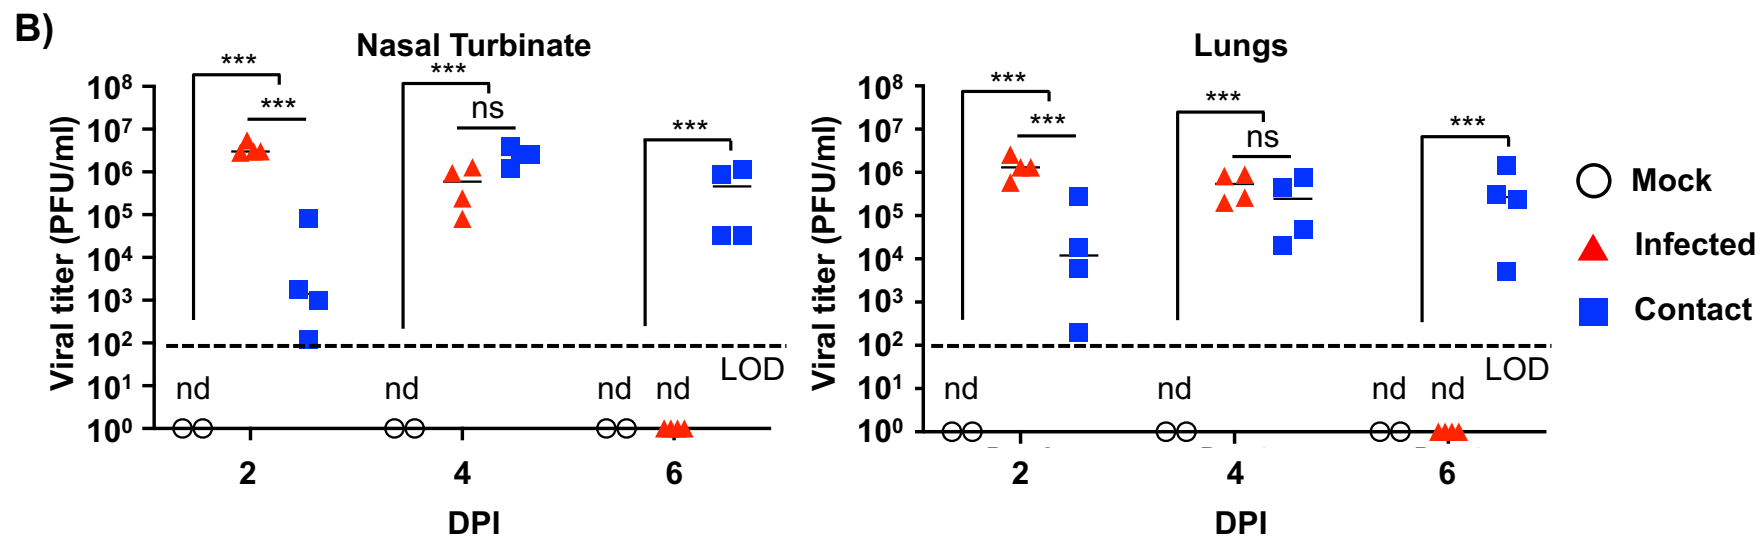

Source: http://biorxiv.org/content/10.1101/2022.06.23.497376v1.full.pdf
